1 **ErbB Signalling is a Potential Therapeutic Target for Vascular Lesions with Fibrous Component**

2 Ilmonen H. <sup>1\*</sup>, Jauhiainen S. <sup>1\*</sup>, Vuola P. <sup>2,3</sup>, Rasinkangas H. <sup>1</sup>, Pulkkinen H.H. <sup>1</sup>, Keränen S. <sup>1</sup>, Kiema  
3 M. <sup>1</sup>, Liikkanen J.J. <sup>1</sup>, Laham-Karam N. <sup>1</sup>, Laidinen S. <sup>1</sup>, Aavik E. <sup>1</sup>, Lappalainen K. <sup>3,5</sup>, Lohi J. <sup>3,4</sup>,  
4 Aronniemi J. <sup>3,5</sup>, Örd T. <sup>1</sup>, Kaikkonen M.U. <sup>1</sup>, Salminen P. <sup>3,6</sup>, Tukiainen E. <sup>2</sup>, Ylä-Herttuala S. <sup>1,6,7</sup>,  
5 Laakkonen J.P. <sup>1</sup>

6 <sup>1</sup>A.I. Virtanen Institute for Molecular Sciences, University of Eastern Finland, Kuopio, Finland,

7 <sup>2</sup>Department of Plastic Surgery, Helsinki University Hospital and University of Helsinki, Helsinki,

8 Finland, <sup>3</sup>VASCERN VASCA European Reference Centre, <sup>4</sup>Department of Pathology, HUSLAB,

9 Helsinki University Hospital and University of Helsinki, Helsinki, Finland, <sup>5</sup>Department of Radiology,

10 HUS Diagnostic Center and Helsinki University Hospital and University of Helsinki, Helsinki, Finland,

11 <sup>6</sup>Department of Pediatric Surgery, New Children's Hospital, Helsinki University Hospital and

12 University of Helsinki, Helsinki, Finland, <sup>7</sup>Science Service Center, Kuopio University Hospital,

13 Kuopio, Finland, and <sup>8</sup>Gene Therapy Unit, Kuopio University Hospital, Kuopio, Finland. \*equal

14 contribution

15 Address correspondence: PhD. Johanna Laakkonen, A.I. Virtanen Institute for Molecular Sciences,

16 University of Eastern Finland, Kuopio, Finland, [Johanna.p.laakkonen@uef.fi](mailto:Johanna.p.laakkonen@uef.fi)

17

18

19 **ABSTRACT**

20 **Background.** Sporadic venous malformation (VM) and angiomatosis of soft tissue (AST) are benign,  
21 congenital vascular anomalies affecting venous vasculature. Depending on the size and location of the  
22 lesion, symptoms vary from motility disturbances to pain and disfigurement. Due to high recurrence of  
23 the lesions more effective therapies are needed.

24 **Methods.** As targeting stromal cells has been an emerging concept in anti-angiogenic therapies, here,  
25 by using VM/AST patient samples, RNA-sequencing, cell culture techniques and a xenograft mouse  
26 model, we investigated the crosstalk of endothelial cells (EC) and fibroblasts and its effect on vascular  
27 lesion growth.

28 **Results.** We report, for the first time, expression and secretion of transforming growth factor A (TGFA)  
29 in ECs or intervascular stromal cells in AST and VM lesions. TGFA induced secretion of VEGF-A  
30 paracrinally, and regulated EC proliferation. Oncogenic PIK3CA variant in p.H1047R, a common  
31 somatic mutation found in these lesions, increased TGFA expression, enrichment of hallmark hypoxia,  
32 and in a mouse xenograft model, lesion size and vascularization. Treatment with afatinib, a pan-ErbB  
33 tyrosine-kinase inhibitor, decreased vascularization and lesion size in mouse xenograft model with ECs  
34 expressing oncogenic PIK3CA p.H1047R variant and fibroblasts.

35 **Conclusions.** Based on the data, we suggest that targeting of both intervascular stromal cells and ECs  
36 is a potential treatment strategy for vascular lesions having a fibrous component.

37 **Funding.** Academy of Finland, Ella and Georg Ehnrooth foundation, the ERC grants, Sigrid Jusélius  
38 Foundation, Finnish Foundation for Cardiovascular Research, Jane and Aatos Erkkö Foundation, and  
39 Department of Musculoskeletal and Plastic Surgery, Helsinki University Hospital.

40 **Key words:** venous malformation, angiomatosis of soft tissue, intervascular stromal cells, fibroblasts,  
41 transforming growth factor A, TGFA, vascular endothelial growth factor A, VEGF-A, paracrine  
42 signaling, PIK3CA p.H1047R, epidermal growth factor receptor, EGFR, ErbB, afatinib

43

44 **GRAPHICAL ABSTRACT**

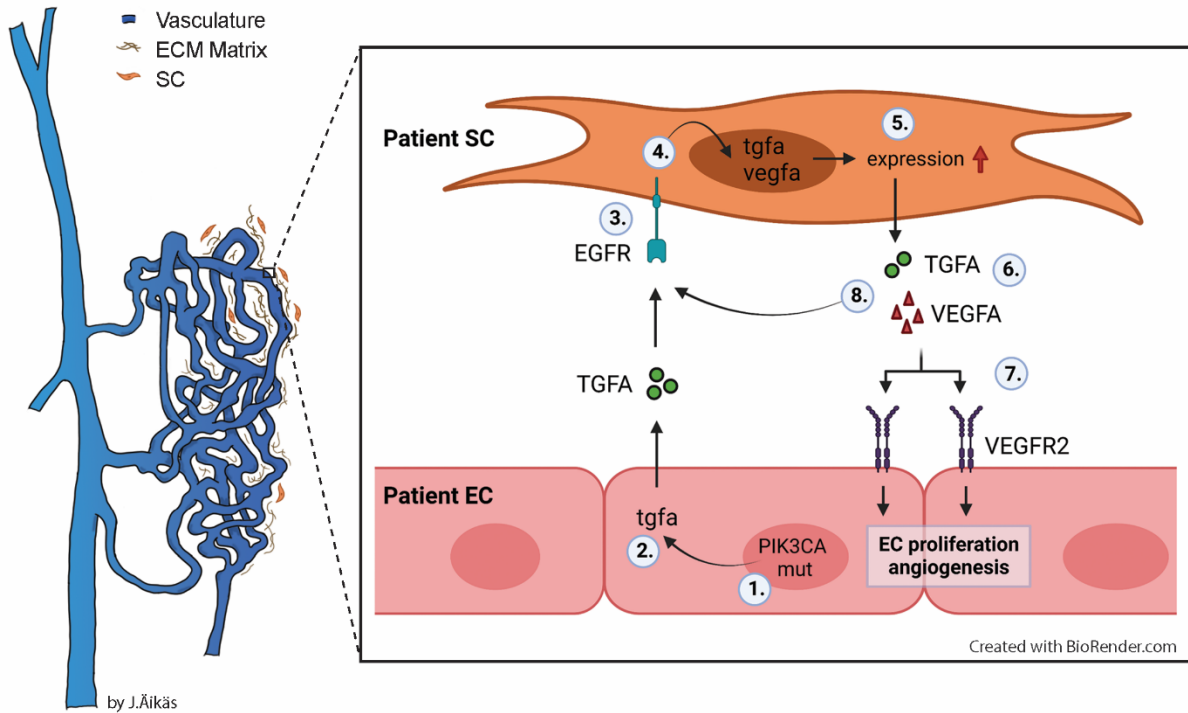

45

46 **Graphical abstract. Proposed model for the paracrine signaling of TGFA/VEGF-A in vascular lesion.**

47 Schematic illustration showing the general structure of venous malformation or angiomas of soft tissue.  
48 Pathological vasculature in the lesion (dark blue) is surrounded by disorganized extracellular matrix (ECM) and  
49 intervacular stromal cells (SCs, orange). High magnification from the area close to vessel wall demonstrates the  
50 proposed model for crosstalk between endothelial cells (ECs) and SCs. A mutation in phosphatidylinositol-4,5-  
51 biphosphate 3-kinase catalytic subunit alpha (PIK3CA) gene (1) or other processes promote ECs to express high  
52 level of transforming growth factor A (TGFA) (2). TGFA binds to epithelial growth factor receptor (EGFR) on  
53 the surface of adjacent SCs (3). Activated EGFR-downstream signaling (4) promotes elevated expression of  
54 vascular endothelial growth factor (VEGF)-A in SCs and increases the expression of TGFA (5). VEGF-A secreted  
55 from SCs (6) binds to VEGF-receptor-2 (VEGFR2) on surface of ECs (7) and together with TGFA activates  
56 angiogenic EC phenotype. TGFA secreted from the SCs (8), can further activate EGFR and its downstream  
57 signaling.

58

59

60

61

## 62 INTRODUCTION

63 Sporadic venous malformation (VM) and angiomas of soft tissue (AST) form a heterogeneous group  
64 of vascular anomalies affecting venous vasculature (1,2). Lesions form due to a local defect in vascular  
65 development during embryogenesis and expand with time, manifesting clinically usually in late  
66 childhood or early adulthood (3). VM can locate in any tissue or internal organ and be either superficial  
67 or permeate multiple tissue planes (4), whereas AST is typically found in extremities or trunk being  
68 subcutaneous or intramuscular. In both, symptoms vary from limited aesthetic harm to motility  
69 disturbances, muscle weakness, pain, disfigurement, and life-threatening bleeding, depending on the  
70 size and location of the lesion.

71 Overlapping magnetic resonance imaging findings, but distinctive histological features, are usually  
72 found between VM and AST (5). In both AST and VM, venous structures form enlarged, irregular  
73 vascular channels (5,6). Fibrous connective tissue with fibroblasts is detected around the various-sized  
74 vessels in AST (5), while sclerotherapy can cause secondary fibrosis in VMs (7). Whereas VMs consists  
75 solely of venous structures, AST also has artery-like vessels, lymphatic vessels, small capillaries and  
76 mesenchymal tissue components, especially muscle-infiltrating fat (5,8) In ISSVA classification (i.e.  
77 International Society for the Study of Vascular Anomalies), AST is classified under provisionally  
78 unclassified vascular anomalies ([issva.org/classification](http://issva.org/classification), y.2018). In sporadic VMs, somatic mutations  
79 in tyrosine protein kinase receptor TEK are found in approximately half of the patients, while somatic  
80 PIK3CA mutations are found in 20% of the VMs lacking TEK alterations (9,10). Somatic PIK3CA  
81 mutations have also been associated with AST (11). Causative mutations in these genes lead to chronic  
82 activation of AKT and dysregulation of EC migration, expression of angiogenic factors as well as  
83 alterations in composition and processing of the extracellular matrix (9,12,13)

84 VM or AST do not regress spontaneously. If conservative treatment is ineffective, symptomatic  
85 lesions are treated with percutaneous sclerotherapy, percutaneous cryotherapy, endovascular laser  
86 treatment or surgical resection (14-18). At present, sirolimus targeting the PI3K/AKT/mTOR pathway  
87 is tested in clinical trials for the treatment of VM (19,20) (ClinicalTrials.gov, study nro:  
88 NCT02638389). So far, most of the previous studies have been focusing on the role of ECs in VM or



89 AST pathogenesis. As targeting of stromal cells is an emerging concept for the development of anti-  
90 angiogenic therapies (21-23), we studied here crosstalk of ECs and intervascular stromal cells in VM  
91 and AST and assessed the role of fibroblasts in PI3K-driven lesion growth in mice.

92

## 93 **RESULTS**

94 **Patient Demographics.** Patient samples were classified according to ISSVA guidelines by a  
95 pathologist specialized in vascular anomalies (**Tables 1-2**). 35 patients were included in the study  
96 having VM (n=15) or AST (n=20). Additionally, 3 patients were classified as VM/AST having  
97 characteristic features of both vascular anomalies. All lesions were unifocal, except 3 multifocal VM  
98 lesions. Median age of the AST and VM patients were 18 (range 11-46 years, female-to-male ratio 14:6)  
99 and 31 (range 9-77 years female-to-male ratio 6:9), respectively. Most of the AST lesions (85%) located  
100 in the extremities. Of all AST lesions, 60% were intramuscular lesions (12/20), 5 lesions affected both  
101 intramuscular and subcutaneous tissue, and 1 both synovial membrane and intramuscular tissue. 60%  
102 of the VM lesions were from the extremities. Of all VM lesions, 3 were intramuscular, 2 located in both  
103 intramuscular and subcutaneous tissue, and 2 affected synovial membrane, intramuscular and  
104 subcutaneous tissue. All VM/AST lesions (n=3, 100%) were from the extremities, of which 1 was  
105 intramuscular. Genetic mutations were detected from vascular lesions by droplet digital PCR (ddPCR).  
106 Oncogenic PIK3CA variants were detected in 19/38 patients (AST 75%, VM 18%; **Table 1-2**), of which  
107 PIK3CA p.H1047R/L somatic mutation was found in 10/19 patients. 53% of patients had received  
108 sclerotherapy (VM 3/15, AST 15/20, VM/AST 2/3 patients, respectively). A representative magnetic  
109 resonance image of AST lesion locating in an ankle of a 13-year-old male is presented in **Fig. 1A**. A  
110 representative 3D confocal image of vessel organization in the AST lesion is shown in **Fig. 1B**. CD31-  
111 labelled longitudinal vessels were shown to be torturous, branched and variable in size (**Fig. 1B**).

112 **Table 1. Demographics of patients with AST patients**

| Patient          | Gender | Age | Pathological diagnosis | # of lesions | Tissue <sup>a</sup> | Location | Somatic mutation (Fractional abundance <sup>d</sup> ) |
|------------------|--------|-----|------------------------|--------------|---------------------|----------|-------------------------------------------------------|
| 1 <sup>b,c</sup> | F      | 11  | AST                    | 1            | im                  | calf     | -                                                     |
| 2 <sup>b,c</sup> | M      | 34  | AST                    | 1            | im                  | shoulder | PI3KCA p.E542K (WT: 10.25; EC: 50.65; SC: none)       |
| 3 <sup>b,c</sup> | M      | 16  | AST                    | 1            | im                  | calf     | PI3KCA p.H1047R (WT: 18.80; EC: 44.00; SC: none)      |
| 4 <sup>b,c</sup> | F      | 16  | AST                    | 1            | sc                  | shin     | PI3KCA p.H1047L (WT: 8.30; EC: 48.95; SC: none)       |
| 5 <sup>b</sup>   | F      | 17  | AST                    | 1            | im                  | back     | -                                                     |
| 6                | M      | 34  | AST                    | 1            | im                  | thigh    | -                                                     |
| 7                | M      | 17  | AST                    | 1            | im                  | thigh    | PI3KCA p.E542K (WT: 7.32)                             |
| 8                | F      | 31  | AST                    | 1            | im                  | thigh    | PI3KCA p.H1047R (WT: 5.07)                            |
| 9                | F      | 22  | AST                    | 1            | im                  | thigh    | PI3KCA p.H1047R (WT 13.10)                            |
| 10               | F      | 13  | AST                    | 1            | im, sc              | foot     | PI3KCA p.E545K (WT: 11.65)                            |
| 11               | M      | 19  | AST                    | 1            | im                  | thigh    | PI3KCA p.H1047R (WT: 8.89)                            |
| 12               | M      | 13  | AST                    | 1            | im, sc              | ankle    | PI3KCA p.H1047R (WT: 12.60)                           |
| 13               | F      | 23  | AST                    | 1            | im                  | calf     | PIK3CA p.Y644H <sup>e</sup>                           |
| 14               | F      | 41  | AST                    | 1            | sc                  | shin     | -                                                     |
| 15               | F      | 25  | AST                    | 1            | im                  | foot     | PI3KCA p.E545K (WT: 8.93)                             |
| 16               | F      | 16  | AST                    | 1            | im, sc              | ankle    | PI3KCA p.H1047R (WT: 5.98)                            |
| 17               | F      | 46  | AST                    | 1            | im, sc              | back     | PI3KCA p.E542K (WT: 9.83)                             |
| 18               | F      | 18  | AST                    | 1            | im, sc              | ankle    | PI3KCA p.E545K (WT: 11.35)                            |
| 19               | F      | 13  | AST                    | 1            | im                  | calf     | -                                                     |
| 20               | F      | 24  | AST                    | 1            | im, sm              | thigh    | PI3KCA p.E542K (WT: 5.64)                             |

113 <sup>a</sup>Tissue: im, intramuscular; sc, subcutaneous; sm, synovial membrane.

114 <sup>b</sup>ECs and SCs isolated for cell experiments; <sup>c</sup>used in RNA-seq experiment.

115 <sup>d</sup>Fractional abundance of the mutation in WT, whole tissue lysate; EC, endothelial cells; SC, intervascular  
116 stromal cells; <sup>e</sup> mutation detected by whole-exome sequencing.

117

118 **Table 2. Demographics of patients with VM**

| Patient           | Gender | Age | Pathological diagnosis | # of lesions | Tissue <sup>a</sup> | Location                                   | Somatic mutation (Fractional abundance in whole tissue lysate) |
|-------------------|--------|-----|------------------------|--------------|---------------------|--------------------------------------------|----------------------------------------------------------------|
| 21                | M      | 34  | VM                     | 1            | im                  | thigh                                      | TEK p.Y1108X <sup>d</sup>                                      |
| 22 <sup>b,c</sup> | F      | 77  | VM                     | 6            | sc                  | neck, fossa cubitalis, chest, hip, big toe | TEK p.L914F (5.63)                                             |
| 23                | M      | 40  | VM                     | 2            | im                  | chest, back                                | -                                                              |
| 24                | F      | 69  | VM                     | 3            | im, sc              | forearm <sup>e</sup> , hand                | TEK p.L914F (10.01)                                            |
| 25                | M      | 24  | VM                     | 2            | sc                  | ankle, sole                                | PI3KCA p.H1047L (3.83)                                         |
| 26                | M      | 14  | VM                     | 1            | sc                  | lip                                        | TEK p.L914F (16.31)                                            |
| 27                | F      | 39  | VM                     | 1            | im                  | chest                                      | -                                                              |
| 28                | M      | 28  | VM                     | 1            | sc                  | clavicle                                   | TEK p.L914F (5.95)                                             |
| 29                | M      | 46  | VM                     | 1            | sc                  | shin                                       | -                                                              |
| 30                | M      | 31  | VM                     | 1            | sc                  | knee                                       | TEK p.L914F (10.60)                                            |
| 31                | F      | 21  | VM                     | 1            | im, sc, sm          | knee                                       | -                                                              |
| 32                | M      | 16  | VM                     | 1            | im, sc, sm          | thigh, knee                                | -                                                              |
| 33                | M      | 9   | VM                     | 1            | sc, sm              | knee                                       | -                                                              |
| 34                | F      | 35  | VM                     | 1            | im, sc              | blade                                      | TEK p.L914F (12.10)                                            |
| 35                | F      | 16  | VM                     | 1            | sc                  | ankle                                      | PI3KCA p.E545K (4.34)                                          |
| 36                | M      | 21  | VM/AST                 | 1            | im                  | upper arm                                  | PI3KCA p.H1047R (3.91)                                         |
| 37                | F      | 41  | VM/AST                 | 1            | sc                  | ankle                                      | KRAS p.Q61R <sup>d</sup>                                       |
| 38                | F      | 25  | VM/AST                 | 1            | sc                  | calf, leg                                  | PI3KCA p.H1047L (5.23)                                         |

119 <sup>a</sup> Tissue: im, intramuscular; sc, subcutaneous; sm, synovial membrane.

120 <sup>b</sup> ECs and SCs isolated for cell experiments; <sup>c</sup> used in RNA-seq experiment.

121 <sup>d</sup> mutation detected by whole-exome sequencing.

122 <sup>e</sup> The patient had multiple lesions but only a lesion located in the forearm was operated.

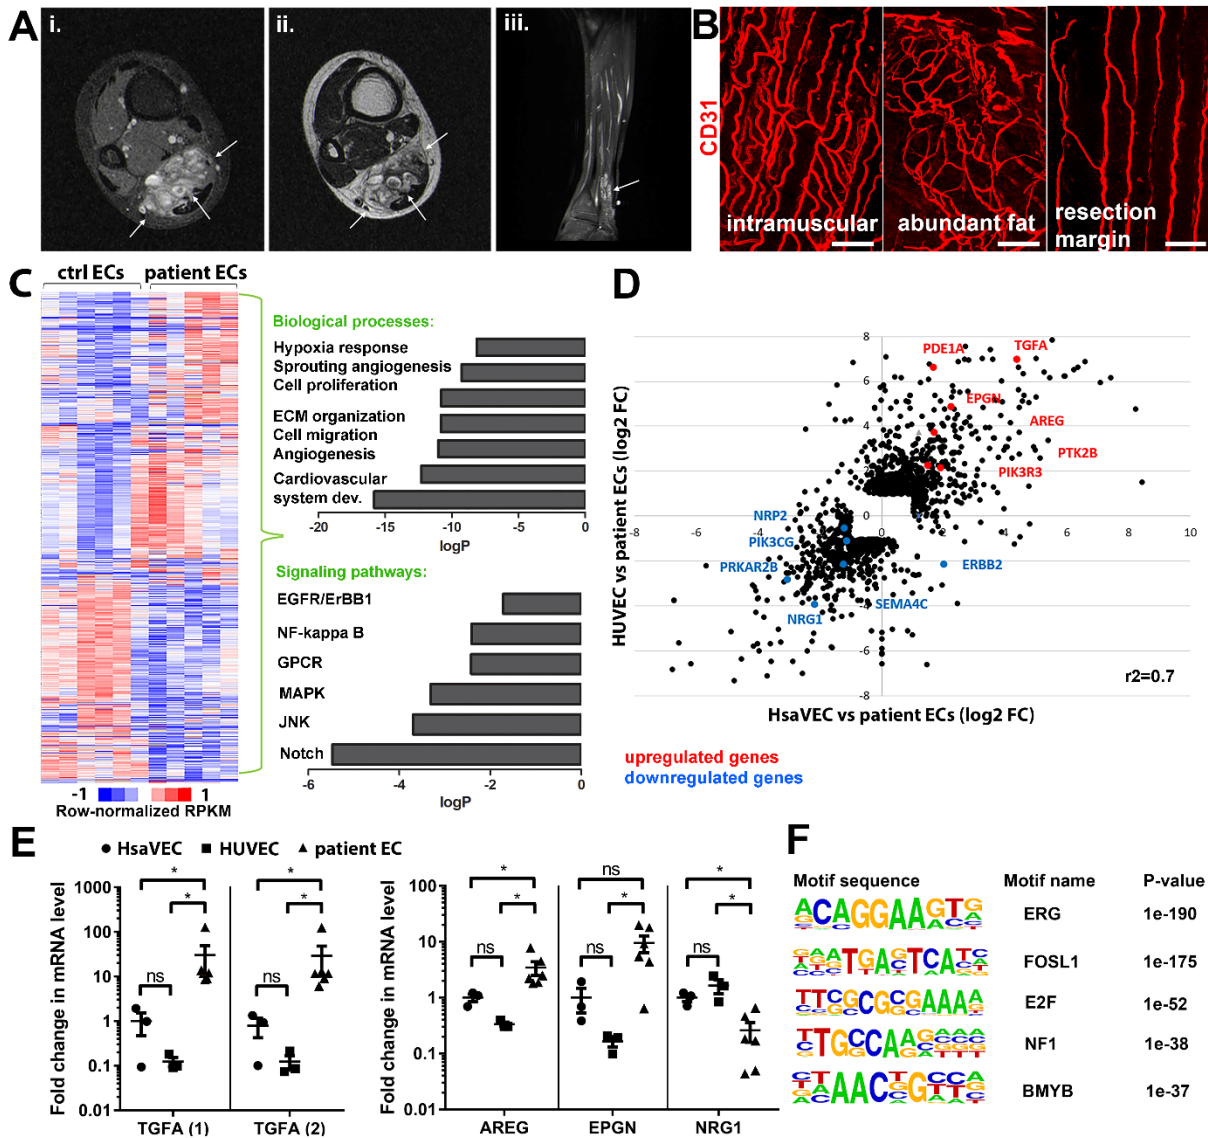

123

124 **Figure 1. Genes involved in ErbB signaling pathway are upregulated in patient-derived ECs in vascular**  
 125 **lesions with venous component.** **A)** Magnetic resonance images of an AST lesion (arrows) in soleus muscle  
 126 show the replacement of the normal muscle by dilated venous channels, diffusely enhancing small vessels and  
 127 adipose tissue. i) Axial T1-weighted fat-saturated contrast enhanced image. ii) Axial T2-weighted image. iii)  
 128 Sagittal T2-weighted fat-saturated image. **B)** Imm-thick whole immunomounts were prepared from patient  
 129 lesions, immunolabelled and imaged by laser scanning confocal microscopy. Images of the vasculature in AST  
 130 lesion located in shin of a 16-year-old female are shown. Endothelial cells are immunolabeled with CD31 antibody  
 131 (red). Vasculature of the same lesion in the intramuscular area (i), with abundant fat (ii) and next to resection  
 132 margin (iii) are presented. Longitudinal vessels are seen. Scale bars, 100 $\mu$ m. **C)** Heatmap of normalized RPKM  
 133 values (-1 to 1) of the differentially regulated genes in patient-derived ECs compared to HUVEC and HsaVEC  
 134 control cells detected by bulk RNA-seq. Clustering was performed using Spearman's rank correlation. Biological  
 135 processes and cell signaling pathways detected by gene ontology analysis in patient-derived ECs. **D)** Scatter plot  
 136 of the fold changes in gene expression comparing patient-derived and control ECs. Selected genes involved in  
 137 PIK3CA, VEGFR2 and ErbB1-4 signaling are highlighted in red (upregulated) and blue (downregulated). Pearson  
 138 correlation value ( $r^2$ ) is shown. **E)** Changes in mRNA expression levels of ErbB ligands (TGFA, with two  
 139 different assays; amphiregulin, AREG; epigen, EPGN1; neuregulin 1, NRG1) were validated with RT-qPCR from  
 140 patient-derived and control ECs. Mean and SEM are presented (HsaVEC and HUVEC, n=3; patient ECs, n=5).  
 141 \*,  $p < 0.05$ . **F)** Sequence motifs associated with differentially regulated genes in patient-derived ECs.

142 **TGFA is upregulated in patient-derived ECs and vascular lesions with venous component.** Five  
143 fresh tissue samples, including 4 AST and 1 VM, were obtained for bulk RNA-sequencing experiments.  
144 After digestion steps, ECs were selected by CD31 microbead kit. Somatic mutations in PIK3CA were  
145 detected by ddPCR in lesions from 3 out of 5 patients (**Table 1-2**), and for the first time, in ECs isolated  
146 from AST lesions (**Table 1**). Bulk RNA-sequencing was used to compare gene expression profiles of  
147 patient-derived<sup>CD31+</sup>ECs to healthy ECs derived from umbilical cord (HUVEC) or saphenous vein  
148 (HsaVEC). With principal component analysis, VM was not distinguished from AST samples and thus,  
149 was kept in the analysis. 1128 and 571 genes were found to be differentially expressed between control  
150 cells and patient-derived<sup>CD31+</sup>ECs, respectively (**Fig. 1C-D**). Differentially expressed genes (DEGs)  
151 were involved in angiogenic cellular processes, such as cell proliferation, migration, extracellular  
152 matrix organization and hypoxia (**Fig. 1C; Supplementary material 1**). Of particular interest were the  
153 fourteen genes found to be involved in ErbB signaling pathway known to regulate pathological  
154 angiogenesis. Multiple ligands of ErbB1-4 receptors were detected, e.g., transforming growth factor A  
155 (TGFA), amphiregulin (AREG), neuregulin-1 and epigen (EPGN). Also, G protein-coupled receptor  
156 signaling and RAS/MAPK cascade were found to be regulated (**Fig. 1C; Table 3**), previously linked to  
157 ErbB activation and downstream signaling (24,25). Similar genes and signaling pathways, e.g., TGFA  
158 and cell migration, proliferation, and ECM organization, were shown to be regulated in a separate  
159 analysis done for patient ECs with oncogenic PIK3CA variant only in comparison to control ECs (**Fig.**  
160 **1 – figure supplement 1-2**).

161 Significant upregulation of ErbB1/EGFR ligands TGFA and amphiregulin (AREG) was validated  
162 by RT-qPCR in patient-derived<sup>CD31+</sup>ECs in comparison to control ECs, whereas no difference was  
163 observed in the regulation of ErbB4 ligand EPGN (**Fig. 1E**) (26,27). In accordance with data from bulk  
164 RNA-sequencing, ErbB2-ErbB4 binding neuregulin-1 was downregulated in patient-derived<sup>CD31+</sup>ECs  
165 (**Fig. 1E**). De novo motif analysis of regulatory regions, i.e. enhancers within 100 kb of the gene  
166 transcriptional start site, was further used to identify possible regulatory transcription factor binding  
167 sites in patient-derived ECs that could regulate their phenotype. Cell cycle regulators E2F and FOSL1  
168 were found to be the major regulators of transcription activity together with EC-specific transcription  
169 factor ERG (**Fig. 1F**).

170 **Table 3. Selected cell signaling pathways regulated in patient-derived ECs.**

| GO         | Term                                                               | Genes                                                                                                                                                                                                                      |
|------------|--------------------------------------------------------------------|----------------------------------------------------------------------------------------------------------------------------------------------------------------------------------------------------------------------------|
| GO:0038127 | ERBB signaling pathway                                             | PRKCE, TNRC6C, PDE1A, <b>AREG</b> , RPS27A, <b>TGFA</b> , KITLG, <b>ERBB2</b> , PTK2B, DGKD, PRKAR2B, <b>NRG1</b> , RPS6KA5, PRKACB                                                                                        |
| GO:0043122 | regulation of I-kappaB kinase/ NF-kappaB signaling                 | GREM1, LURAP1, BIRC3, TNFAIP3, S100A4, MALT1, LITAF, PRKCE, LPAR1, C18orf32, ZFAND6, RPS27A, PLK2, TLR4, F2RL1, CASP1, S100A13                                                                                             |
| GO:0008277 | regulation of G-protein coupled receptor protein signaling pathway | RGS4, RGS9, DYNLT1, RGS11, CXCL8, RGS10, RGS20, RGS5, RAMP2, RGS7, PLCB1, ADRBK2                                                                                                                                           |
| GO:0043410 | positive regulation of MAPK cascade                                | PAK1, MAP4K2, SEMA4C, <b>TGFA</b> , GADD45G, KSR2, <b>ERBB2</b> , NENF, PLCB1, TPD52L1, GLIPR2, ICAM1, CD74, PRKCE, LPAR1, PDCD10, INSR, IGF1R, GADD45A, RPS27A, PTK2B, KITLG, HGF, F2RL1, TLR4, PIK3CG, ZEB2, <b>EPGN</b> |
| GO:0046328 | regulation of JNK cascade                                          | PAK1, MAP4K2, GADD45A, IGF1R, GADD45G, TNXB, PTK2B, CBS, SFRP1, PLCB1, F2RL1, TLR4, TPD52L1, ZEB2                                                                                                                          |
| GO:0007219 | Notch signaling pathway                                            | HEY2, NOTCH1, TNRC6C, RBX1, TMEM100, LFNG, RPS27A, E2F1, DTX3, NOTCH2, MESP1, DNER, FOXC1, SNAI2, HDAC9                                                                                                                    |

171 \*ErbB pathway receptors and ligands are marked in bold.

172

173

174

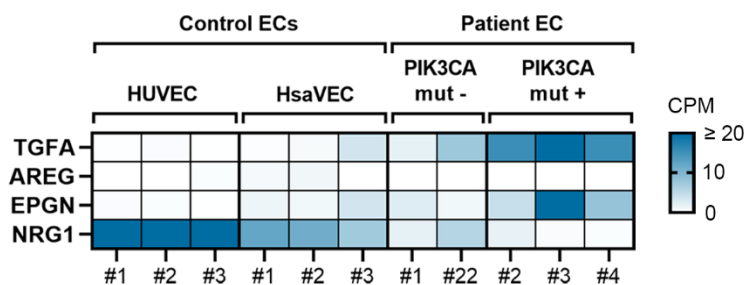

175

176 **Figure 1 – figure supplement 1.** RNAseq data revealed that the highest levels of TGFA and EPGN mRNA were  
 177 detected in patient-derived ECs having an oncogenic PIK3CA variant (PIK3CAmut+ Patient EC) in comparison  
 178 to control ECs (HUVEC, HsaVEC) and patient-derived ECs without any oncogenic PIK3CA variant  
 179 (PIK3CAmut- Patient ECs), while NRG1 mRNA was lower in patient-derived EC than control ECs. Data is  
 180 presented in a heatmap format and shows normalized sequencing reads (counts per million reads, CPM) for the  
 181 target gene expression in each sample separately. Scale 0-20 CPM (CPM values  $\geq 20$  are presented with the  
 182 highest color intensity).  
 183



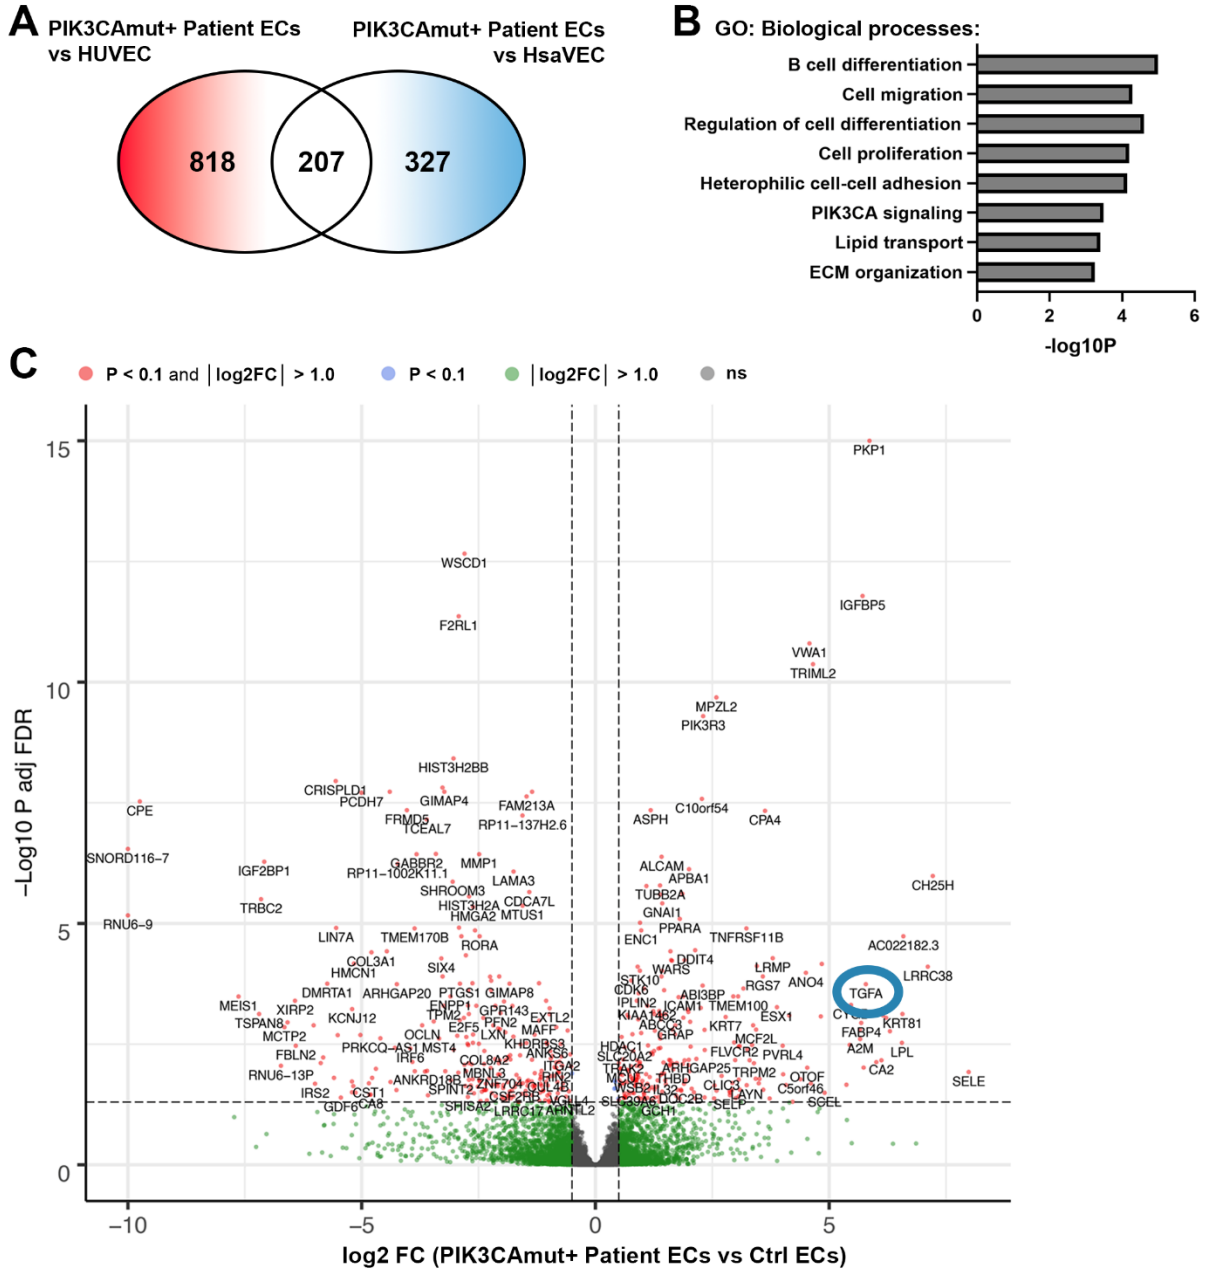

184

185

186 **Figure 1 –figure supplement 2.** A) Further analysis demonstrated 818 DEGs between PIK3CAmut+ Patient ECs  
 187 and HUVEC, and 327 DEGs between PIK3CAmut+ Patient ECs and HsaVECs (FDR-adjusted p-value < 0.1,  
 188 log2 FC > 1.0 for both comparison). Since gene expression patterns in HUVECs and HsaVECs were rather similar  
 189 (compared to patient-derived ECs), both control EC types were clustered together for the downstream analysis.  
 190 Final analysis revealed 499 (FDR-adjusted p-value < 0.1, log2 FC > 1.0) DEGs between PIK3CAmut+ Patient  
 191 ECs (n=3) and control ECs (HUVEC and HsaVEC, n=6). B-C) Biological processes detected by gene ontology  
 192 analysis of DEGs (B) and a volcano plot of the genes (C) are presented. C) A blue circle highlights detection of  
 193 TGFA as one of the top upregulated DEGs with connection to patient-derived ECs with an oncogenic PIK3CA  
 194 variant.

195

196

197

198 Next, expressions of TGFA and AREG were validated at tissue level from patient lesions. TGFA  
199 mRNA was shown to be upregulated in both AST and VM by RT-qPCR (**Fig. 2A**, n=8 VM, n=3 AST)  
200 in comparison to control tissue, whereas no change of AREG mRNA was observed (**Fig. 2 – figure**  
201 **supplement 1A**). By immunohistochemistry, TGFA was detected in endothelium, pericytes and  
202 intervascular stromal cells in both AST and VM lesions (**Fig. 2B-C; Fig. 2 – figure supplement 1B;**  
203 **positivity in 4/5 VM, 9/10 AST, 1/1 VM/AST lesions**). Activated EGFR pathway was further  
204 demonstrated in AST lesions by detecting phosphorylated EGFR (**positivity in 9/9 AST lesions; Fig.**  
205 **2D**), with most of the signal located in intervascular stromal cells. A heatmap for scoring of TGFA and  
206 pEGFR expression levels and the presence of oncogenic PIK3CA variant is presented in **Fig. 2E**,  
207 showing moderate or strong expression of these factors in the lesions.

208 In support of findings in immunohistochemistry, TGFA mRNA upregulation or secretion was  
209 detected in patient-derived<sup>CD31+</sup>ECs and in intervascular stromal<sup>CD31-, vimentin+</sup> cells (Patient SCs; **Fig. 2F-**  
210 **G**). By morphology patient SCs resembled fibroblasts, and (**Fig. 2F**) were characterized by western blot  
211 to be negative for CD31 marker and positive for fibroblast and/or smooth muscle cell marker vimentin  
212 (**Fig. 2 – figure supplement 1D-F**). None of the patient SCs had PIK3CA mutations detected by ddPCR  
213 (**Table 1**). Higher expression of EGFR mRNA was detected in control fibroblasts and patient SCs in  
214 comparison to ECs (**Fig. 2 – figure supplement 1C**). The data was in-line with scRNAseq data from  
215 mouse lower limb skeletal muscle (Tabula Muris, [czbiohub.org](http://czbiohub.org)) where *Egfr* did express in  
216 mesenchymal stem cells and skeletal muscle satellite cells but only in a small portion of ECs (**Fig. 2 –**  
217 **figure supplement 2A-B**). On the contrary, a small number of *Tgfa*<sup>+</sup> cells were detected in mouse  
218 normal healthy skeletal muscle, showing the highest number of *Tgfa*<sup>+</sup> cells in the EC cluster (**Fig. 2 –**  
219 **figure supplement 2C-D**).

220 Altogether, these results suggest that ErbB binding ligands are upregulated in AST and VM, and  
221 that TGFA, demonstrated to induce angiogenesis in earlier studies (26,28,29) could be among potential  
222 factors to induce a pro-angiogenic phenotype of lesion ECs.



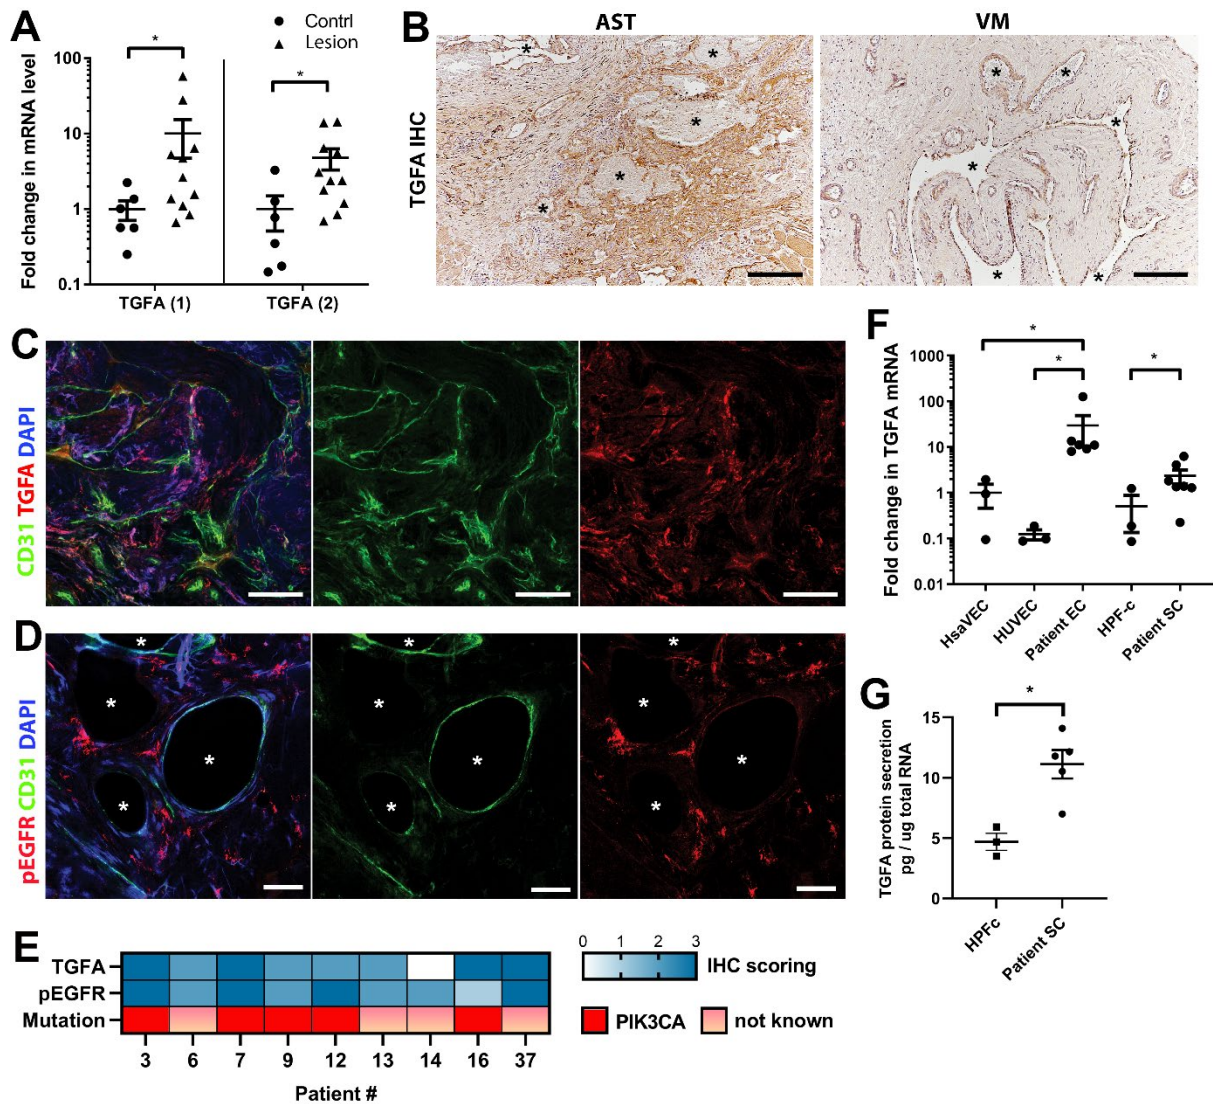

223

224 **Figure 2. EGFR/ErbB1 ligand TGFA is upregulated in VM and AST patient tissue samples.** **A)** RT-qPCR  
 225 analysis showed significantly higher expression of TGFA mRNA (with two different assays) in VM and AST  
 226 tissue than in control group. Mean and SEM are presented (lesions n=11; control group, n=6). \*, p < 0.05. **B)**  
 227 Representative images of TGFA expression in AST and VM patient samples. See Supplemental Figure 2B for  
 228 normal skeletal muscle control. TGFA signal was detected in lesions in endothelium, pericytes and intrastromal  
 229 cells by immunohistochemistry. Asterisks point out the largest vascular lumens which, especially in AST, are  
 230 commonly tightly packed with erythrocytes. Scale bars, 200  $\mu$ m. **C)** Representative whole immunomount images  
 231 of CD31-labelled endothelium (green) and TGFA expression (red) in a patient diagnosed with intramuscular AST.  
 232 Nuclei are stained with DAPI (blue). Longitudinal vessels are seen. Scale bars, 100 $\mu$ m. **D)** Representative  
 233 confocal images of phosphorylated EGFR (red) expression in AST lesion. Endothelium is labelled with CD31  
 234 antibody (green), nuclei with DAPI. Vascular lumens are indicated with white asterisks in the cross-sections.  
 235 Scale bars, 50 $\mu$ m. **E)** Heatmap of TGFA and pEGFR protein expression and presence of oncogenic PIK3CA  
 236 variants in AST patients. Level of protein expression was scored (0-3) based on the detected signal in  
 237 immunocytochemistry (0, none; 1, low; 2, medium; and 3, high). **F)** RT-qPCR analyses of TGFA expression in  
 238 patient-derived ECs and intervascular stromal cell (SCs). Selection of ECs was performed by CD31 MicroBead  
 239 Kit. Stromal cells were characterized by western blot and showed to be negative for EC marker CD31, and positive  
 240 for fibroblast and smooth muscle cell marker vimentin (see Suppl. Fig. 2). The data is presented as relative mean  
 241 fold change to HsaVEC control group and SEM (HsaVEC, HUVEC and HPF-c, n=3; patient ECs, n=5; patient  
 242 SCs, n=6). \*, p < 0.05. **G)** TGFA was shown to be secreted from patient-derived intervascular stromal cell (SCs)  
 243 by ELISA (patient SC n=5; HPF-c n=3). \*\*, p < 0.005.

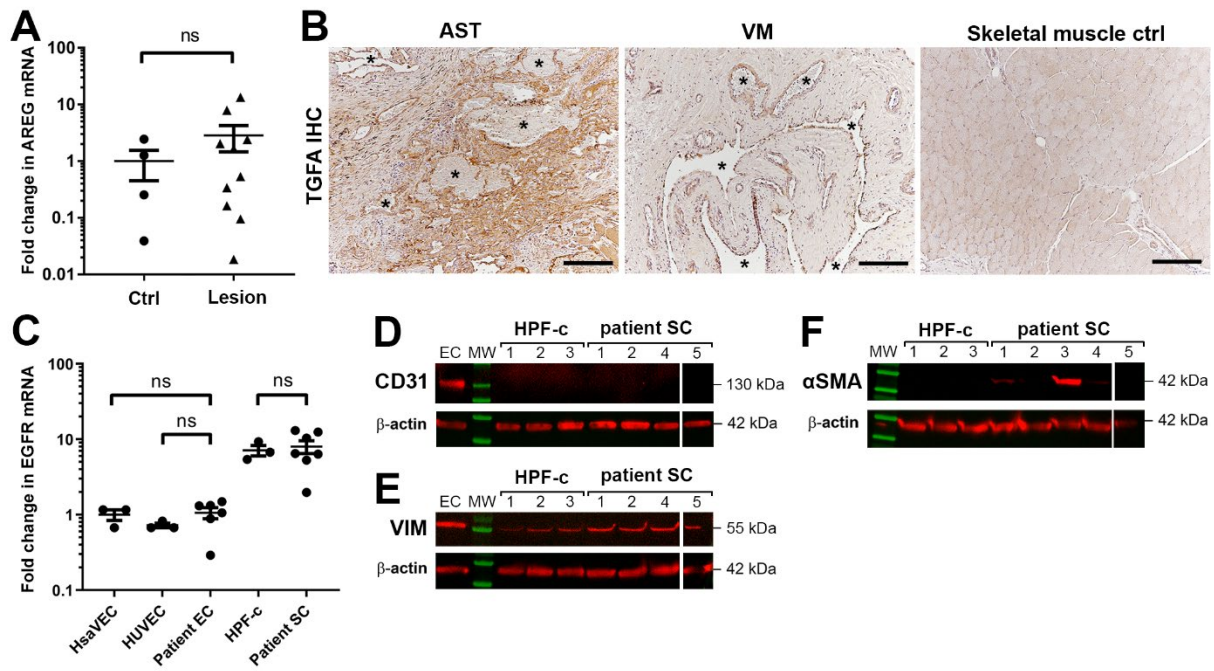

244

245 **Figure 2 – figure supplement 1. A)** Expression of ErbB1 ligand amphiregulin in VM and AST lesions. RT-qPCR  
 246 analysis of amphiregulin (AREG) mRNA in VM and AST lesions. Mean and SEM are presented (lesions n=10;  
 247 control group, n=4; 1 lesion sample and 2 controls are not included in the blot due to having AREG mRNA  
 248 expression under the detection limit). \*,  $p < 0.05$ . **B)** Representative images of TGFA expression in AST and VM  
 249 patient samples and in normal skeletal muscle control. TGFA signal was detected in lesions in endothelium,  
 250 pericytes and intrastromal cells by immunohistochemistry. Asterisks point out the largest vascular lumens detected  
 251 in the pathological samples. Scale bars, 200  $\mu\text{m}$ . **C)** EGFR expression levels in patient-derived ECs and  
 252 intervascular stromal cells. The data is presented as relative mean fold change to HsaVEC control group and SEM  
 253 (HsaVEC, HUVEC and HPF-c, n=3; patient ECs and patient SCs, n=6). \*,  $p < 0.05$ ; ns, no significant difference.  
 254 **D-F)** Western blot analysis for cell-type specific markers. Besides evident cell morphology, patient-derived  
 255 intervascular stromal cells were confirmed to be CD31 negative (**D**). All samples were positive for a fibroblast  
 256 marker vimentin (**E**). Some intervascular stromal cells were shown to be positive for  $\alpha\text{SMA}$  (**F**), a typical marker  
 257 of activated fibroblasts and smooth muscle cells. **D-F)**  $\beta$ -actin was used as a control to confirm equal loading of  
 258 the samples.

259

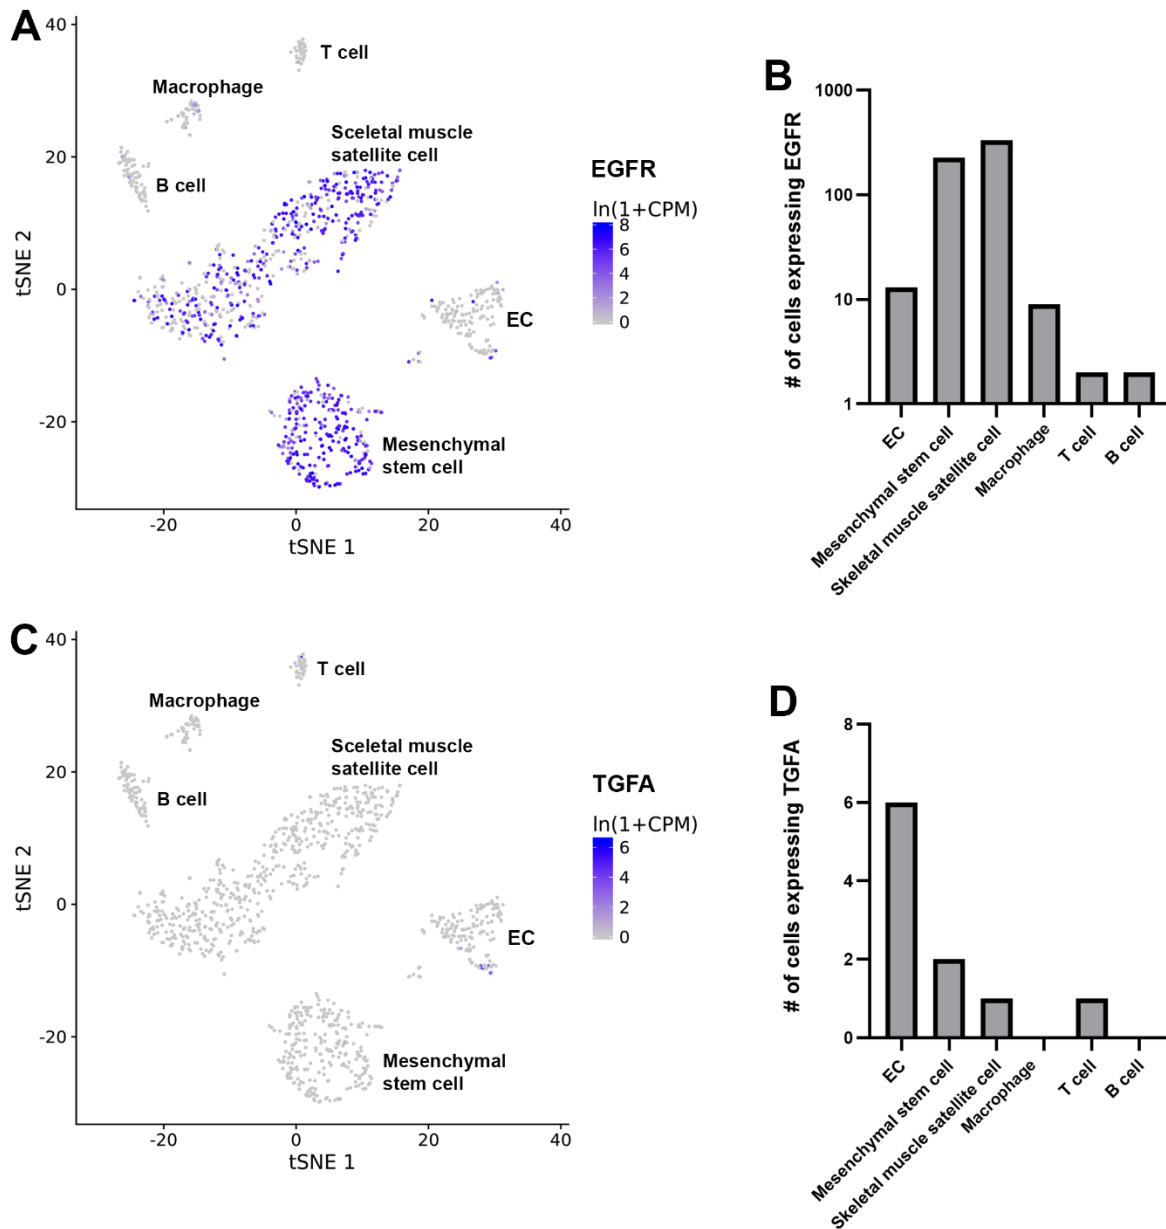

260

261 **Figure 2 – figure supplement 2.** scRNAseq data from mouse lower limb skeletal muscle (Tabula Muris,  
262 [czbiohub.org](https://czbiohub.org)) of *Egfr* (A-B) and *Tgfa* (C-D) expression. *Egfr* was expressed mainly in mesenchymal stem cells  
263 and skeletal muscle satellite cells but only a small portion in ECs. A very few *Tgfa*<sup>+</sup> cells were detected in mouse  
264 normal healthy skeletal muscle.

265

266

267 **Oncogenic PIK3CA p.H1047R induces expression of TGFA and enrichment of hallmark hypoxia.**

268 To understand the mechanism behind TGFA upregulation in patient lesions, and the potential role of  
269 oncogenic PIK3CA variant in it, bulk RNA-sequencing was performed on lentiviral-transduced ECs  
270 that expressed either wild-type or oncogenic PIK3CA p.H1047R, the most common somatic mutation  
271 found from this patient cohort (**Table 1-2; Fig. 3; Fig. 3 – figure supplement 1-2**). In-line with our  
272 experiments with patient-derived<sup>CD31+</sup>ECs, TGFA mRNA expression was shown to be induced in  
273 PIK3CA<sup>H1047R</sup> expressing ECs (**Fig. 3 – figure supplement 1D**). In addition, GO analysis of these cells  
274 showed a hallmark “mTORC1 signaling”, indicative for activation of signaling pathway downstream  
275 from PIK3CA, as well as hallmarks “Glycolysis”, further indicative for a metabolic change from normal  
276 oxygen consumption towards anaerobic energy metabolism (**Fig. 3A**). Interestingly, despite the  
277 normoxic cell culture conditions, hallmark hypoxia was detected as one of the top enriched hallmarks  
278 in PIK3CA<sup>H1047R</sup> expressing ECs by GO analysis (**Fig. 3A**). Further comparison to the RNA-sequencing  
279 data from ECs expressing constitutively active hypoxia inducible factors (HIFs; GSE98060) confirmed  
280 that among 47 independent DEGs detected from our patient-derived<sup>CD31+</sup>ECs (**Fig. 1**) under “Response  
281 to hypoxia” (GO: 0001666) or “Hallmark Hypoxia”, majority (28 DEGs) were significantly altered by  
282 HIF1A, HIF2A or oncogenic PIK3CA p.H1047R. This indicated that part of the HIF regulated genes  
283 were also direct transcriptional targets downstream the oncogenic PIK3CA signaling. Top 15 hypoxia  
284 related DEGs are presented in **Fig. 3B**.

285 As HIFs and their target genes have previously been shown to induce angiogenesis or expression  
286 of TGFA and VEGF-A (30-33) and depletion of HIF1A/HIF2A have been shown to lead to  
287 downregulation in TGFA expression (34) correlation of these factors was next studied in lesions. The  
288 data showed a strong positive correlation between TGFA and HIF1A mRNA expression levels  
289 ( $\rho=0.73$ ), and a moderate correlation between TGFA and HIF2A ( $\rho=0.45$ ) (**Fig. 3C-D**,  $n=12$  AST,  $n=7$   
290 VM,  $n=2$  VM/AST). Additionally, a positive correlation ( $\rho=0.62$ ) between VEGF-A, and TGFA mRNA  
291 expression levels (**Fig. 3E**) was observed. VEGF-A expression or secretion was further validated by  
292 immunohistochemistry in patient lesions (**Fig. 3F-G**) or in patient SCs by RT-qPCR and ELISA (**Fig.**  
293 **3 – figure supplement 3**).



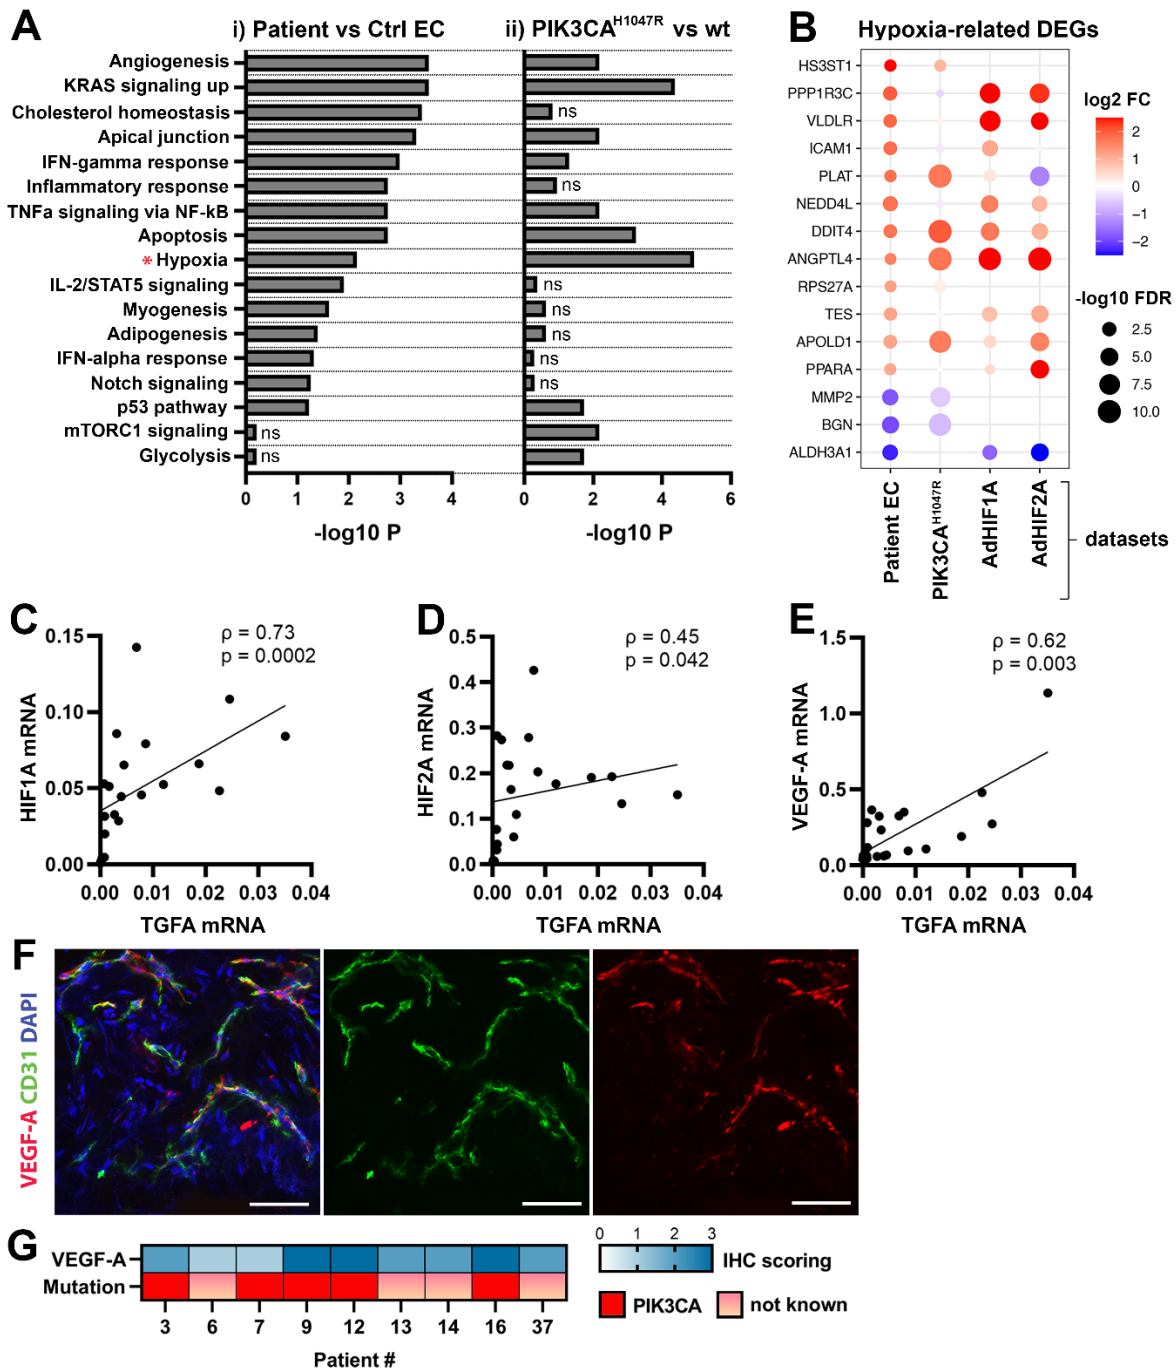

294

295 **Figure 3. Oncogenic PIK3CA p.H1047R induces enrichment of hallmark hypoxia.** A) Several shared  
 296 MSigDB Hallmarks were found in bulk RNA-seq data from i) patient-derived ECs vs control ECs (left panel),  
 297 and ii) ECs expressing PIK3CA wild-type (wt) or most common oncogenic variant detected in patient lesions,  
 298 PIK3CA p.H1047R (right panel). Hallmark analysis was performed with the EnrichR web server, using adjusted  
 299 p-value < 0.1 to define terms with significant enrichment of differentially expressed genes (DEGs). Hallmark  
 300 Hypoxia (\*) was detected as one of the top hallmarks in both RNA-seq datasets. B) Top 15 hypoxia-related genes  
 301 differentially expressed between patient-derived vs control ECs, shown to be regulated in PIK3CA<sup>H1047R</sup>  
 302 expressing ECs and/or HIF1A/HIF2A. C-E) Correlation between TGFA and HIF1A (C), HIF2A (D) and VEGF-  
 303 A (E) mRNA expression levels detected in AST and VM lesions (n=23). Spearman's test was used to define  
 304 correlation. Rho, Spearman's rank correlation coefficient. F) Representative whole immunomount images of  
 305 vasculature in AST lesion expressing VEGF-A (red) detected by confocal microscopy. Endothelium is labelled  
 306 with CD31 antibody (green) and nuclei with DAPI (blue). Co-localization of VEGF-A and CD31 markers are  
 307 seen in yellow. Longitudinal vessels are seen. Scale bars, 50  $\mu$ m. G) Heatmap of VEGF-A expression and presence  
 308 of oncogenic PIK3CA variants in AST patients. Level of VEGF-A expression was scored (0-3) based on the  
 309 detected signal in immunocytochemistry (0, none; 1, low; 2, medium; and 3, high).

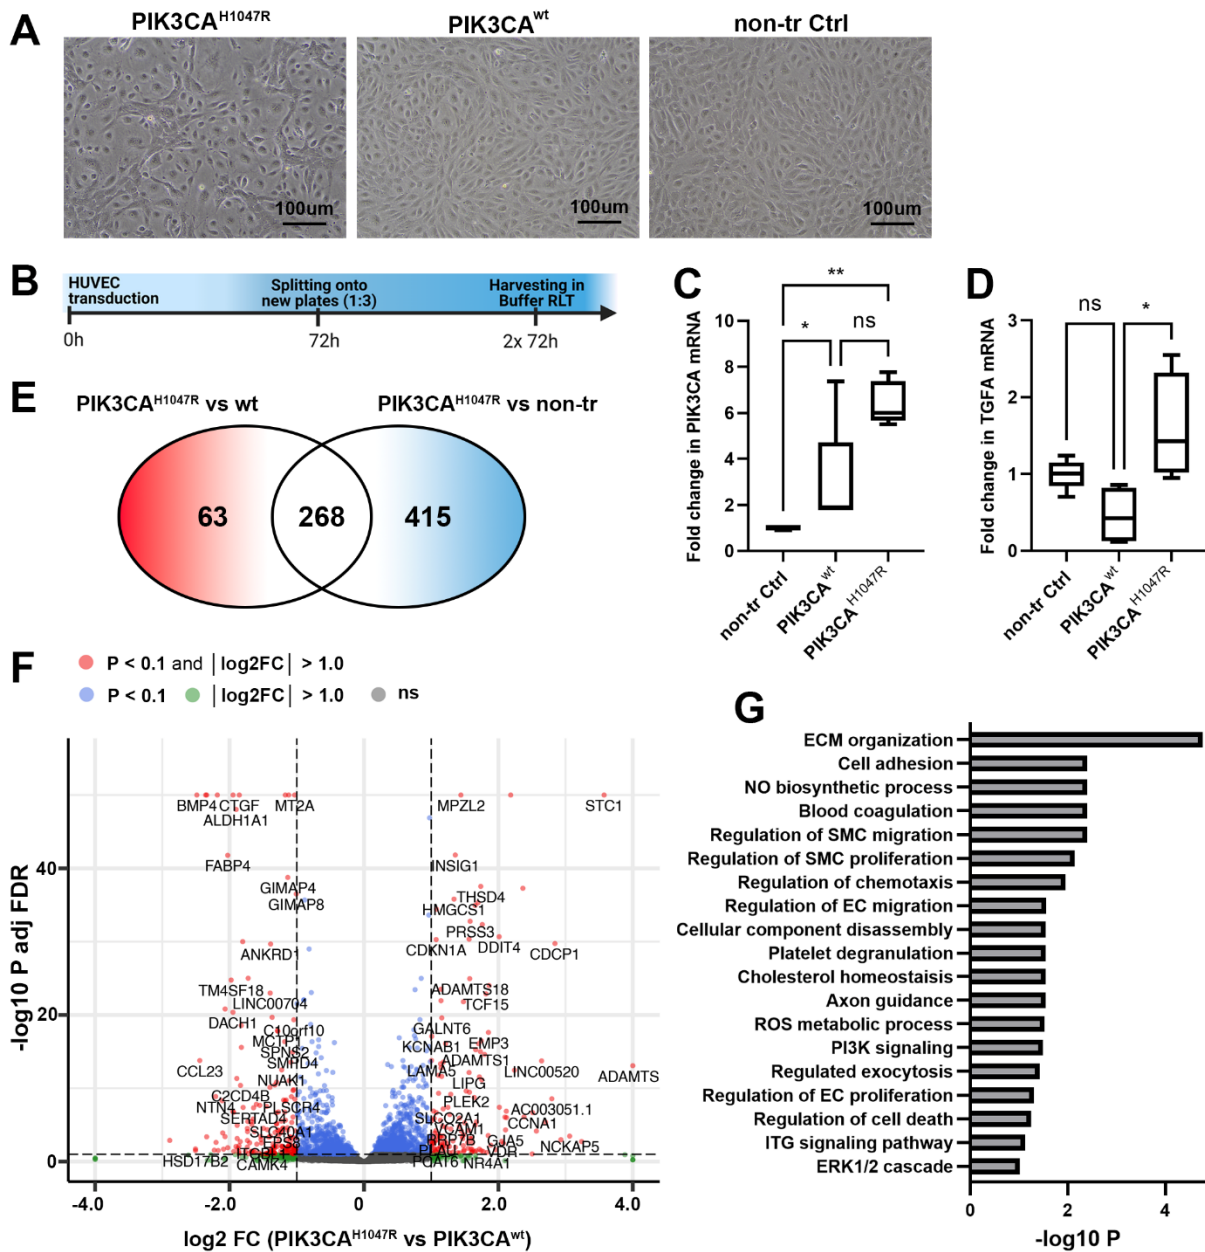

310

311 **Figure 3 – figure supplement 1. A)** In-line with previous publications (9), expression of oncogenic PIK3CA  
 312 variant p.H1047R induced morphological changes in HUVECs. Representative images of HUVECs transfected  
 313 with lentiviral vector (LV) encoding PIK3CA<sup>H1047R</sup> and PIK3CA<sup>wt</sup> (A), in comparison to morphology of non-  
 314 transduced HUVECs. Scale bars, 100µm. **B)** Schematics showing preparation of cell culture samples for RNA-  
 315 sequencing experiments to analyze transcriptional changes induced by PIK3CA<sup>H1047R</sup> in HUVECs. PIK3CA<sup>wt</sup>-  
 316 transduced and non-transduced HUVECs were used as controls (n=4 in each group). **C-D)** Significantly higher  
 317 expression of PIK3CA mRNA was detected in cells expressing PIK3CA<sup>H1047R</sup> or PIK3CA<sup>wt</sup> than non-transduced  
 318 cells, confirming that lentiviral transduction worked, and the vectors are functional (C), meanwhile TGFA mRNA  
 319 was significantly induced in ECs expressing PIK3CA<sup>H1047R</sup> (D). Data is representative from two independent  
 320 experiments done in 5-8 replicates and shown as mean and SEM. \*, p < 0.05; \*\*, p < 0.01). **E-G)** RNA-sequencing  
 321 revealed 268 genes that were differently expressed in PIK3CA<sup>H1047R</sup> than PIK3CA<sup>wt</sup> or non-transduced HUVECs,  
 322 demonstrated using Venn diagram (E) and Volcano plot (F). Biological processes detected by gene ontology  
 323 analysis of differentially expressed genes (G).  
 324

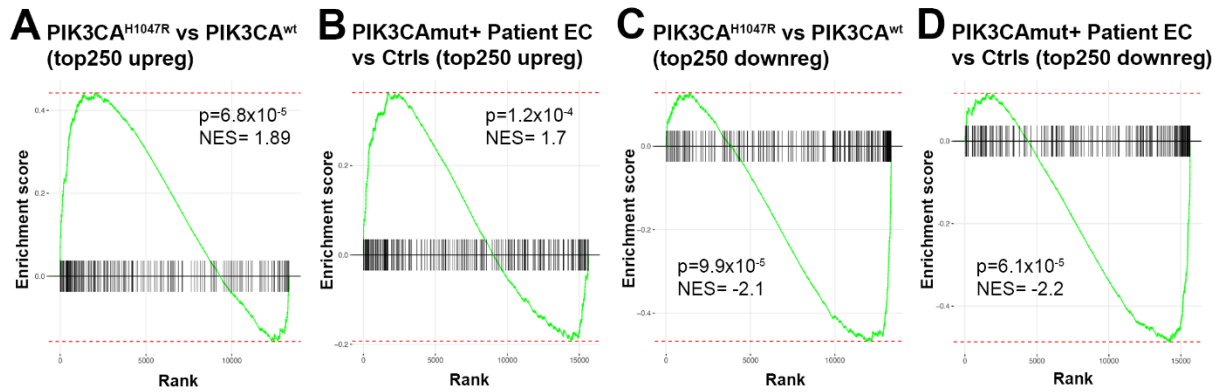

325  
326

327 **Figure 3 – figure supplement 2.** Gene set enrichment analysis (GSEA) done for upregulated (**A-B**) or down-  
328 regulated (**C-D**) DEGs confirms that the RNAseq data from HUVECs overexpressing PIK3CA<sup>H1047R</sup> (vs  
329 PIK3CA<sup>wt</sup>) is well in-line with the RNAseq data from patient-derived ECs (vs control ECs); thus, justifying that  
330 PIK3CA<sup>H1047R</sup> (vs PIK3CA<sup>wt</sup>)-transduced ECs is a feasible model to be used in further experiments. In the GSEA  
331 analysis, top 250 DEGs upregulated in PIK3CA<sup>H1047R</sup> vs PIK3CA<sup>wt</sup>-transduced HUVECs were compared to the  
332 custom gene set consisting of top 250 DEGs upregulated in PIK3CAmut+ Patient ECs vs control ECs (HUVEC,  
333 HsaVEC; all EC types from 3 donor) (**A**) and vice versa (**B**). Top 250 downregulated DEGs from both RNAseq  
334 experiments were compared similarly, by using data from PIK3CAmut+ patient ECs vs control ECs as a query  
335 set in (**C**) and data from PIK3CA<sup>H1047R</sup> vs PIK3CA<sup>wt</sup>-transduced HUVECs as a query set in (**D**). p-values between  
336 6.1x10<sup>-5</sup> and 1.2x10<sup>-4</sup> are considered as a high significance for correlation between the data sets, NES, normalized  
337 enrichment score.

338

339

340

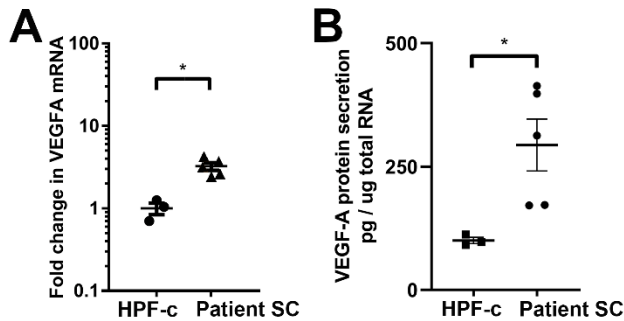

341

342 **Figure 3 – figure supplement 3.** **A**) RT-qPCR analysis of VEGF-A mRNA expression in patient SCs and control  
343 fibroblasts (SCs, n=6; HPF-c, n=3). \*, p < 0.05. **B**) VEGF secretion from patient SCs analyzed by ELISA (SC  
344 n=5; HPF-c n=3). \*, p < 0.05.

345 **Patient SCs and TGFA induce a pro-angiogenic EC phenotype together with VEGF-A.** To study  
346 further the effect of VEGF/TGFA-secreting patient SCs on ECs, we used a modified fibrin bead  
347 angiogenesis assay (35). Patient SCs were shown to induce HUVEC sprouting without any additional  
348 growth factor stimulation (**Fig. 4A-B**), implying that paracrine factors secreted by the SCs modulate  
349 the EC phenotype. We hypothesized that the mechanism could be via TGFA-mediated upregulation of  
350 VEGF-A. Accordingly, a significant increase in VEGF-A mRNA and protein secretion were observed  
351 after stimulation of control fibroblasts (HPF-c) with rhTGFA (**Fig. 4 – figure supplement 1**). Also, in  
352 a fibrin bead assay with HUVECs, co-stimulation with rhVEGF-A and rhTGFA proteins resulted in a  
353 higher increase of EC area and sprouting in comparison to either of the growth factors alone (**Fig. 4C-**  
354 **E**). This suggested that these growth factors have a synergistic effect on modulating EC phenotype.

355 In contrast to TGFA (**Fig. 3 – figure supplement 1D**), no change in VEGF-A mRNA expression  
356 was seen in PIK3CA<sup>H1047R</sup> expressing ECs. Neither did rhTGFA significantly affect cell proliferation  
357 in cultures with ECs or HPF-c alone. To understand the importance of TGFA expression in the growth  
358 of ECs in the presence of PIK3CA<sup>H1047R</sup> mutation and HPF-c or SC, proliferation assays were performed  
359 in co-culture conditions. Co-culturing of PIK3CA<sup>H1047R</sup>-expressing ECs together with HPF-c showed  
360 increased growth rate in comparison to PIK3CA<sup>wt</sup>-treated cells. Importantly, the response was abolished  
361 when TGFA expression in ECs was knocked down by siRNA (**Fig. 4F; Fig. 4 – figure supplement 2**).  
362 Thus, altogether the data suggests that TGFA expression, induced by oncogenic PIK3CA p.H1047R,  
363 results in a pro-angiogenic EC phenotype by increasing cell proliferation and VEGF-A secretion but  
364 only in conditions where ECs and HPF-c/SCs are combined.

365

366



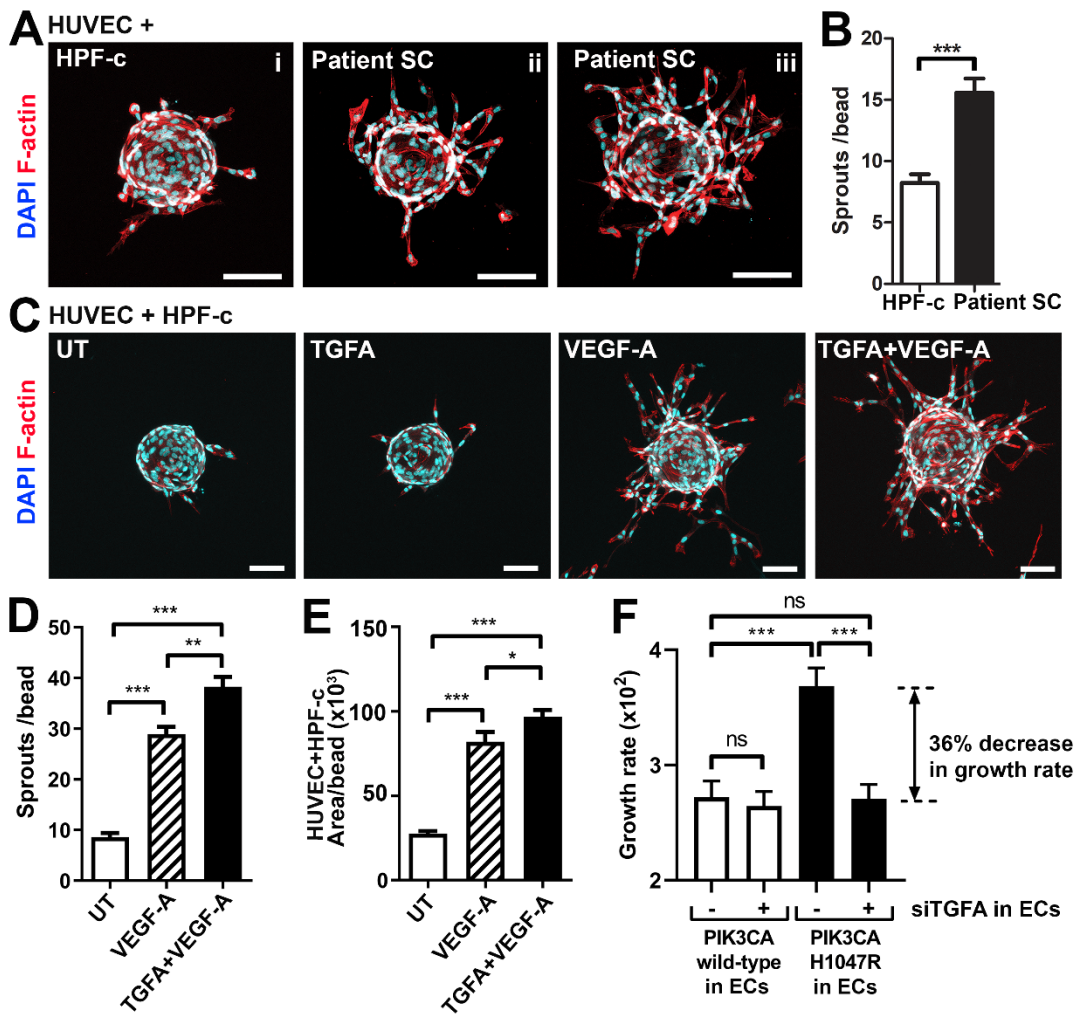

367

368 **Figure 4. Patient SCs and TGFA induce an angiogenic EC phenotype together with VEGF-A.** A-B) VM  
 369 patient SCs induce sprouting of genotypically normal ECs. HUVECs on collagen-coated beads were embedded  
 370 into a fibrin gel and patient SCs or control HPF-c cells were put on top. Representative images are presented at  
 371 d7. ECs are labelled with phalloidin (red), nuclei with DAPI (blue; **A**) The number of sprouts per bead in each  
 372 condition is shown (**B**). 2 independent experiments were done in triplicates. \*,  $p < 0.05$ . In all images, scale bar  
 373  $100\mu\text{m}$ . C-E) Fibrin bead assay with HUVECs and HPF-c cells shows increased EC sprouting after stimulation  
 374 with rhVEGF-A and rhTGFA at d6. ECs are labelled with phalloidin (red), nuclei with DAPI (blue; **C**). The  
 375 number of sprouts per bead (**D**) or sprout area (**E**) in each condition was determined from confocal images by  
 376 ImageJ (45 beads/group). 2 independent experiments were done in triplicates. \*\*\*,  $p < 0.001$ . **F**) Co-culture  
 377 experiments with HPF-c and HUVEC cells showed increased growth rate in wells with PIK3CA<sup>H1047R</sup>-expressing  
 378 ECs in comparison to wells with ECs expressing PIK3CA<sup>wt</sup>. The response was abolished after inhibition of  
 379 endogenous TGFA in ECs by specific siRNA, demonstrating the involvement of TGFA in PIK3CA<sup>H1047R</sup>-induced  
 380 responses. Wells with siCtrl-transduced ECs (marked to be negative for siTGFA) were used as a control group in  
 381 the experiments. Cellular growth was monitored using IncuCyte Live-Cell Imaging system. Data is presented as  
 382 relative growth rate from 2 experiments done in triplicates. \*\*\*,  $p < 0.001$ . In all data, mean and SEM are  
 383 presented.

384

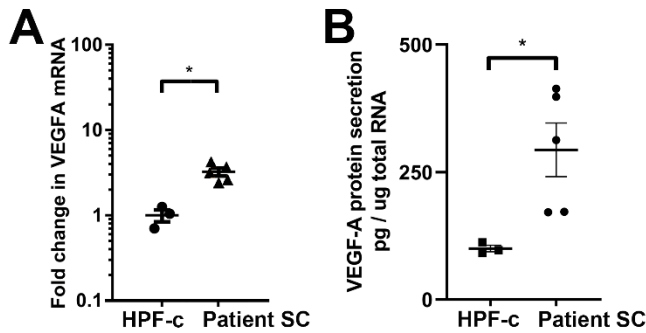

385

386 **Figure 4 – figure supplement 1.** rhTGFA stimulation of HPF-c cells increased VEGF-A mRNA expression (**A**,  
387 **6h**) and VEGF-A protein secretion (**B**, **24h**). The data is from three independent experiments done in triplicates.  
388 **\*\*\***,  $p < 0.001$ .

389

390

391

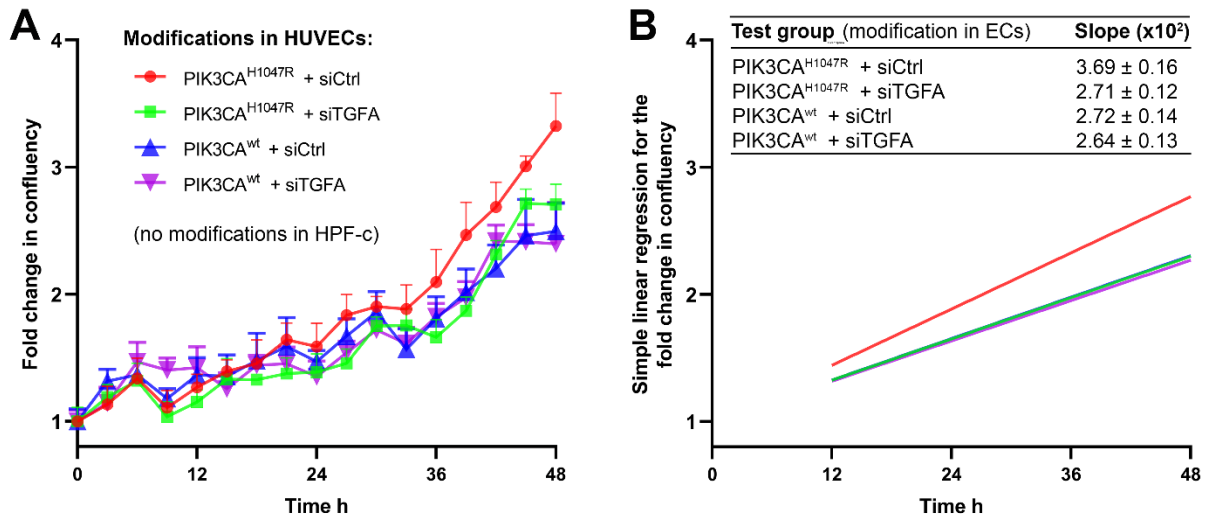

392

393 **Figure 4 – figure supplement 2.** Quantification for proliferation of cells in co-culture experiments combining  
394 ECs expressing PI3KCA<sup>H1047R</sup> or PI3KCA<sup>wt</sup> +/- TGFA and genetically normal HPF-c. Knock-down of TGFA was  
395 performed using siRNA targeting to TGFA and non-targeting control siRNA as a control. Just prior imaging,  
396 HUVECs and HPF-c were mixed at ratio 8:1 to induce crosstalk between the cell types in cultures without external  
397 addition of growth factors. Cell growth was monitored using IncuCyte S3 Live-cell Imaging System for 48h in 3h  
398 intervals, 4 images/well. **A**) Growth curves for each condition show fold change in confluency of cells in relation  
399 to time. Data is presented as mean and SEM from 2 experiments done in triplicates. **B**) Simple linear regression  
400 for cell growth in each condition. Regression lines were generated between time points 12-48 h, as the first 12  
401 hours were considered as a time when the cells settle on wells after seeding. Mean and SEM of slopes of the  
402 regression lines, indicating growth rate of the cells, are shown in the table.

403

404

405 **Fibroblasts induce vascularization in a mouse xenograft model for vascular lesion.** Due to the small  
406 number of cells obtained from patient lesions, further studies to understand the role of SCs/fibroblasts  
407 in lesion formation in vivo were performed with commercially available primary cells. A new modified  
408 mouse xenograft model based on (36) was used for the first time combining: i) ECs expressing either  
409 oncogenic PIK3CA p.H1047R or PIK3CA wild-type, and ii) genotypically normal primary fibroblasts  
410 (HPF-c; **Fig. 5A**). Lesion growth and size at d20 was observed to be similar between PIK3CA<sup>H1047R</sup>-  
411 transfected ECs with or without fibroblasts (**Fig. 5B**). With H&E staining, various sized vascular  
412 channels filled with erythrocytes were detected (**Fig. 5D**). Notably, there was no blood-filled  
413 vascularization shown in explants with ECs expressing PIK3CA<sup>wt</sup>, whereas vascular channels in  
414 explants with PIK3CA<sup>wt</sup> expressing ECs and fibroblasts clearly contained erythrocytes (**Fig. 5C-D, 5H**).  
415 Higher vascularization, detected with EC marker CD31, was observed with explants with embedded  
416 fibroblasts in comparison to ECs alone (**Fig. 5E-F**). In comparison to explants containing only  
417 PIK3CA<sup>H1047R</sup> ECs, the vascular channels with fibroblasts were wider and the endothelium appeared to  
418 be more organized (**Fig. 5E-F**). The highest CD31 vascularization score was detected in explants with  
419 ECs expressing PIK3CA<sup>H1047R</sup> and fibroblasts (**Fig. 5G**). In addition, a higher number of inflammatory  
420 cells were seen in the explants with ECs expressing PIK3CA<sup>H1047R</sup> than PIK3CA<sup>wt</sup>; however, no  
421 statistical difference was detected with or without fibroblasts (**Fig. 5I**).

422 Further immunohistochemistry confirmed production of EGFR protein in the explants with  
423 PIK3CA<sup>H1047R</sup> -expressing ECs; however, no difference was detected between explants with or without  
424 fibroblasts (**Fig. 5 – figure supplement 1**). In summary, the data indicates the importance/potential of  
425 fibroblasts in inducing aberrant vasculature in lesions.

426

427

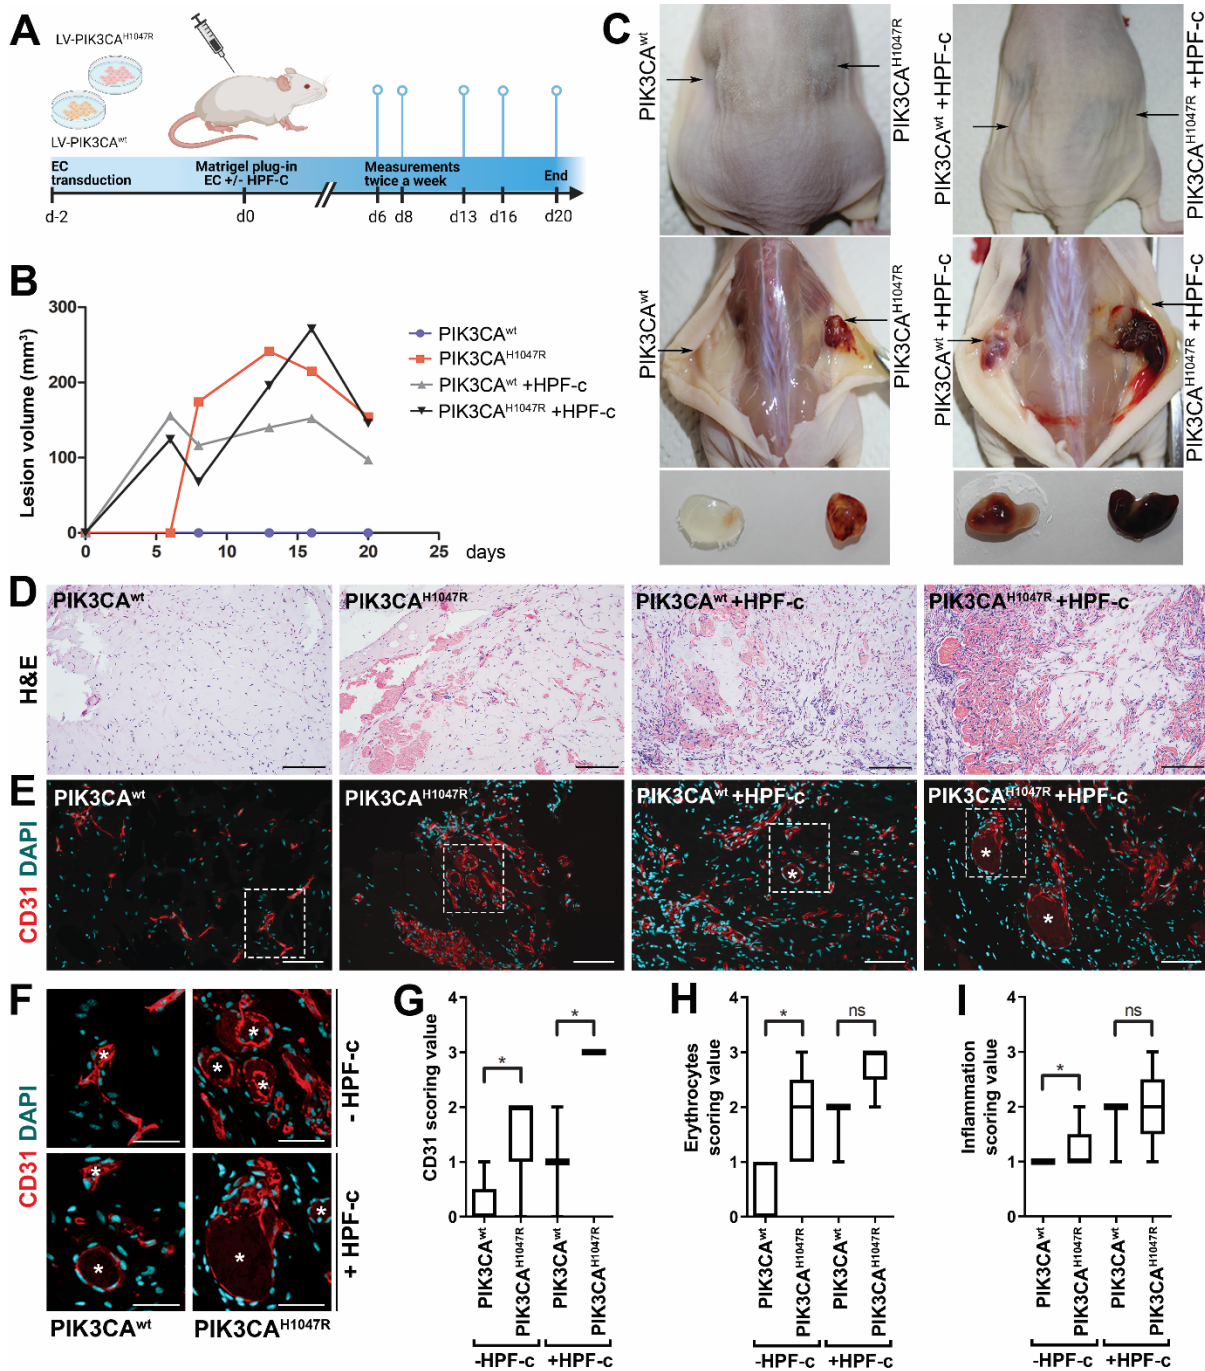

428

429 **Figure 5. Fibroblasts induce vascularization in a mouse xenograft model for vascular lesion.** A)   
 430 Subcutaneous injection of matrigel with HUVECs transduced with PIK3CA<sup>wt</sup> or PIK3CA<sup>H1047R</sup> encoding   
 431 lentivirus vectors, with or without primary fibroblasts, was performed in athymic Nude-Foxn1<sup>nu</sup> mice. A timeline   
 432 of the animal experiment is presented. B) Lesion volume measured by caliper from day 6 to day 20 (n=5 EC<sup>wt</sup>,   
 433 n=5 EC<sup>H1047R</sup>, n=5 EC<sup>wt</sup>+FB, n=5 EC<sup>H1047R</sup>+FB). C) Representative images of mice and dissected lesion explants   
 434 on day 20. D, E) Explant sections stained with hematoxylin and eosin (H&E; D) or EC marker CD31 (red) and   
 435 DAPI (nuclei, blue; E). Scale bars, 200µm, H&E; 100µm, CD31. F) Close-up of the vascular lumens detected in   
 436 the explants with or without fibroblasts (CD31, red; DAPI, blue). Scale bars, 50µm. G) Scoring for vascularization   
 437 done for sections stained for CD31. The highest vascularization was observed in the explants with HUVECs   
 438 expressing PIK3CA<sup>H1047R</sup> and fibroblasts. \*, p < 0.05. H, I) Scoring for erythrocytes (H) and inflammation (I)   
 439 done on H&E-stained sections. \*, p < 0.05.

440



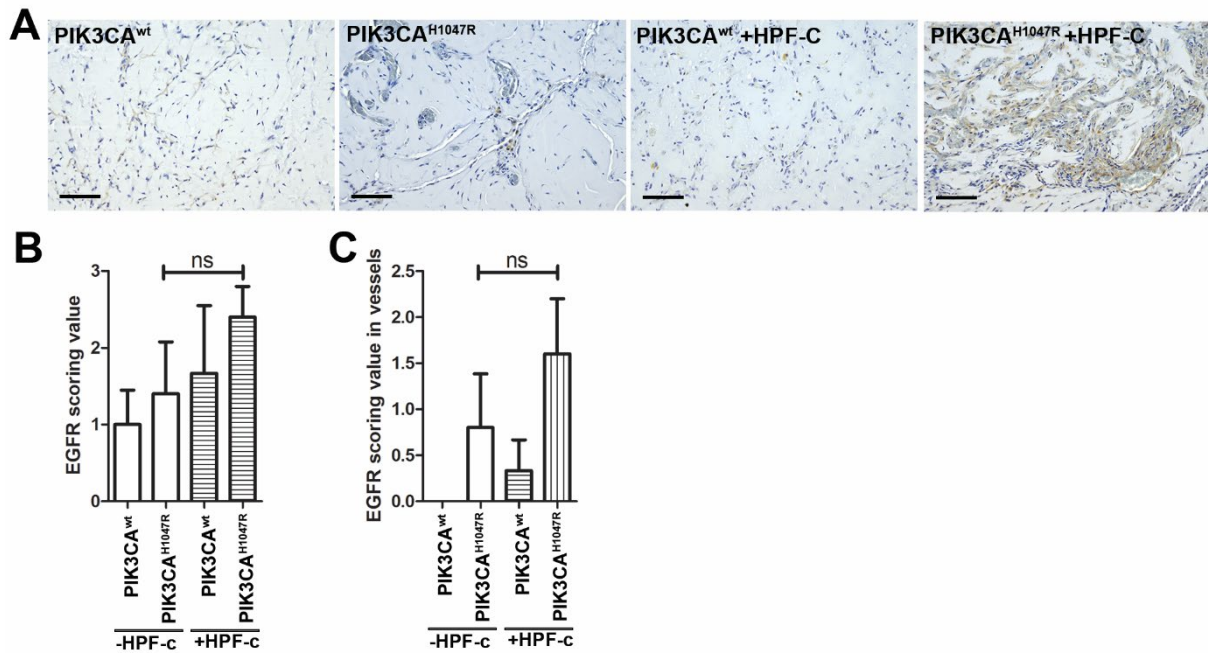

441

442 **Figure 5 – figure supplement 1.** Subcutaneous injection of matrigel with HUVECs transfected with wt or  
443 PIK3CA<sup>H1047R</sup> expressing lentivirus vectors with/without primary fibroblasts was performed in athymic Nude-  
444 Foxn1<sup>nu</sup> mice. **A)** Explant sections stained with EGFR antibody. Scale bars, 100µm. **B-C)** EGFR expression was  
445 scored in the explants in the lesion area (**B**) and in vascular structures (**C**).

446

447 **ErbB family antagonist Afatinib reduces VEGF secretion, angiogenic sprouting and lesion size.**

448 Next, afatinib (Gilotrif<sup>TM</sup>, Giotrif®), an inhibitor of EGFR/ErbB1, ErbB2 and ErbB4, was used to test

449 the potential inhibition of EC angiogenesis and vascular lesion growth in mice. First, *in vitro*, afatinib

450 was shown to block TGFA-stimulated EGFR phosphorylation detected by western blot (**Fig. 6A**), and

451 to decrease VEGF-A secretion from TGFA-stimulated control fibroblasts measured by ELISA (**Fig.**

452 **6B**). Accordingly, in the fibrin bead assay, afatinib was shown to reduce rhVEGF-A and rhTGF-A

453 mediated EC sprouting (**Fig. 6C-D**). To further test the effect of afatinib on PI3K-driven vascular lesion

454 growth, our modified mouse xenograft model was used with ECs expressing oncogenic PIK3CA<sup>H1047R</sup>

455 and genotypically normal primary fibroblasts. Lesions were allowed to form for 9 days, reaching

456 200.1±10.2µm<sup>3</sup> in size, followed by afatinib treatment daily p.o. for 9 days (**Fig. 7A**). At d18, lesion

457 size (**Fig. 7B-C**) and vascularization detected by H&E and CD31 stainings (**Fig. 7H-L**) was shown to

458 be reduced in afatinib-treated mice in comparison to untreated mice. In both groups, various sized

459 vascular channels filled with erythrocytes were seen (**Fig. 7J-K**). A lower number of inflammatory cells

460 was detected in the afatinib treatment group (**Fig. 7K**). Accordingly, reduction of EGFR expression was  
461 detected in explants of afatinib-treated mice (**Fig. 7I, 7M**). Altogether, the data validates that ErbB  
462 signaling plays a key role in PIK3CA p.H1047R lesion formation in the presence of fibroblasts and  
463 provides a new potential therapeutic strategy for targeting vascular lesions with a fibrous component.  
464

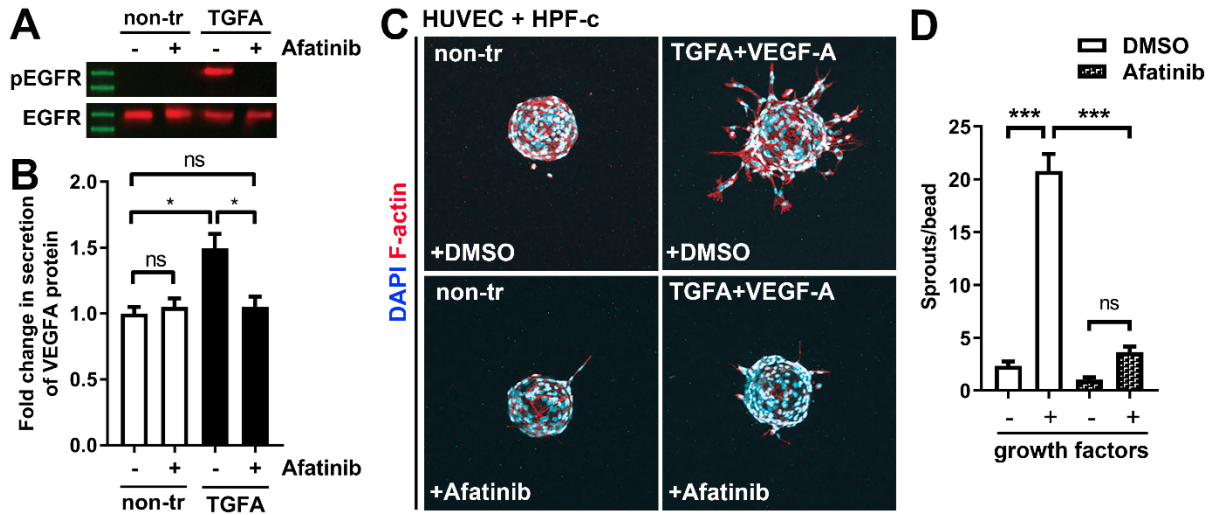

465

466 **Figure 6. Afatinib reduces VEGF-A secretion, angiogenesis and lesion size.** **A)** Afatinib decreased  
467 EGFR/ErbB1-phosphorylation in rhTGFA-stimulated HPF-c cells. Total EGFR was used to control equal loading  
468 of the samples. **B)** VEGF secretion measured by ELISA from rhTGFA-stimulated control fibroblasts (HPF-c)  
469 with or without afatinib treatment. Two independent experiments done in triplicates is presented as mean and  
470 SEM. \*\*,  $p < 0.01$ . **C, D)** In the fibrin bead assay with HUVECs and HPF-c, afatinib inhibited EC sprouting  
471 induced by co-stimulation with rhVEGF-A and rhTGFA. Representative images of each group are presented at  
472 d7 (**C**) ECs are labelled with phalloidin (red) and nuclei with DAPI (blue). Quantitative analysis for the number  
473 of sprouts per bead (**D**) was performed with ImageJ software (30 beads/group). Afatinib treatment was started at  
474 d3 after HUVECs had already formed angiogenic sprouts. The data from two independent experiments done in  
475 triplicates is presented as mean and SEM. \*,  $p < 0.05$ ; \*\*\*,  $p < 0.001$ .

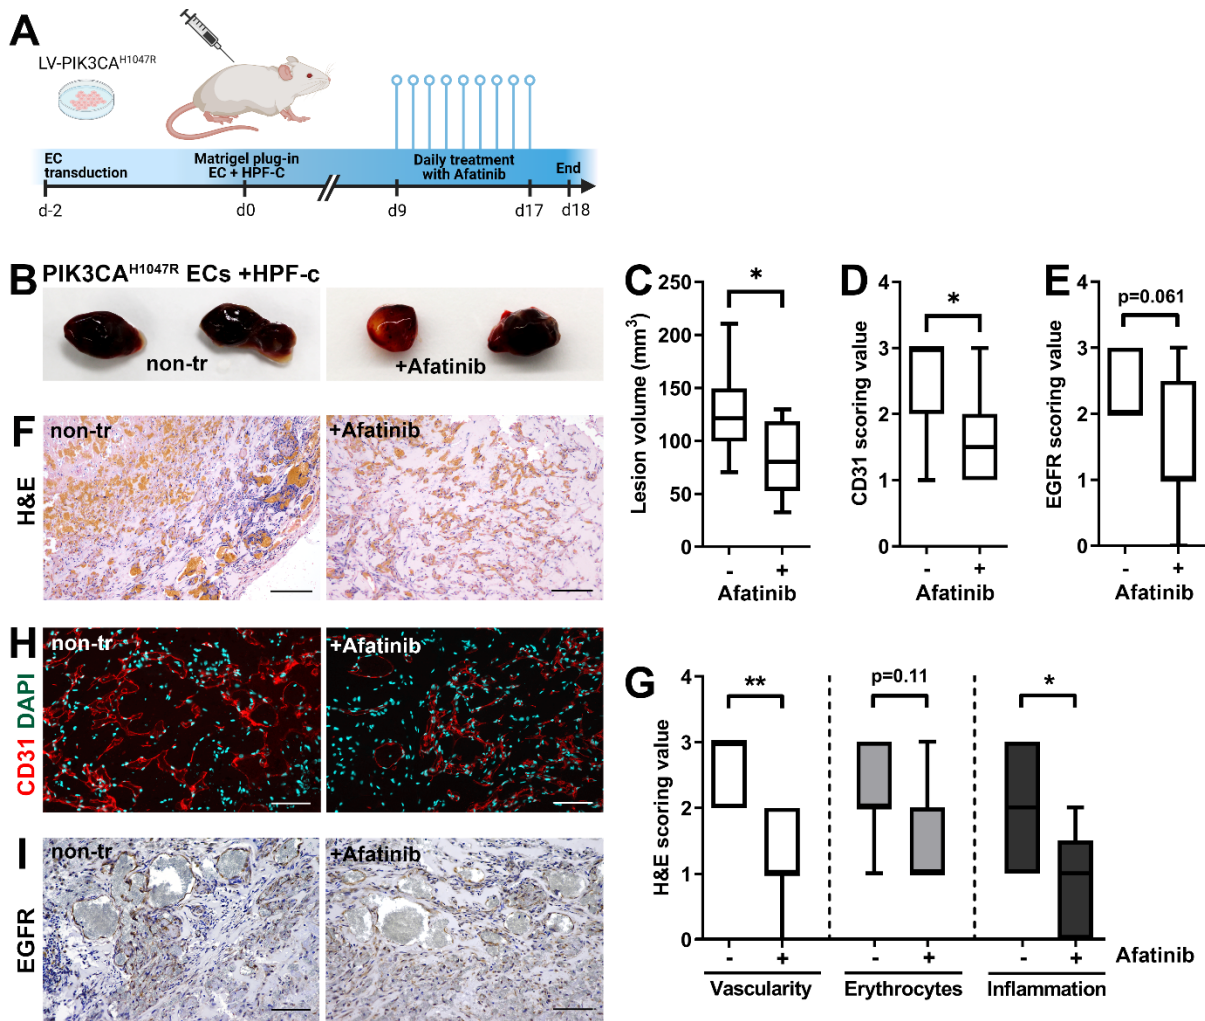

476

477 **Figure 7. Afatinib reduces lesion size in matrigel plug-in assay.** Subcutaneous injection of matrigel with  
 478 HUVECs transfected with PIK3CA<sup>H1047R</sup> expressing lentivirus vectors with primary fibroblasts was performed in  
 479 athymic Nude-Foxn1<sup>tm</sup> mice. After lesions reached 200µm<sup>3</sup> in size, afatinib treatment was started for 9 days (25  
 480 mg/kg, p.o., daily). **A)** A timeline of the animal experiment is presented. **B)** Representative images of dissected  
 481 explants on day 18. **C)** Lesion volume measured from dissected explants at d18 (n=7 untreated, n=9 afatinib  
 482 treated). **D)** Scoring for vascularization done for sections stained for CD31 (**H**, n=7 untreated, n=9 afatinib  
 483 treated). **E)** Scoring for EGFR expression (**I**; n=6 untreated, n=9 afatinib treated). **F,H)** Explant sections stained  
 484 with hematoxylin and eosin (H&E; **F**) or EC marker CD31 (red) and DAPI (nuclei, blue; **H**). Scale bars, 200µm,  
 485 H&E; 100µm, CD31. **G)** Scoring for vascularization, erythrocytes and inflammatory cells done on H&E-stained  
 486 sections. **I)** Explant sections stained with EGFR. Scale bars, 100µm.

487

488

489 **DISCUSSION**

490 Symptomatic AST and VM are primarily treated with compression garments, and if needed, with  
491 percutaneous sclerotherapy, percutaneous cryotherapy, endovascular laser treatment or surgical  
492 resection (14-18). In sclerotherapy, sclerosants are administered using ultrasound guidance  
493 intravenously to induce endothelial damage that leads to a total or partial atrophy of the lesion. Single  
494 sclerotherapy rarely results in an adequate treatment response but often reduces the lesion size  
495 alleviating the symptoms (37). In our earlier study, insufficient response to sclerotherapy was detected  
496 primarily in patients with lower-extremity intramuscular AST lesions (5). Thus, surgery has been used  
497 as the primary treatment for AST, whereas percutaneous sclerotherapy is often the first treatment option  
498 for VM. Due to high recurrence, difficult anatomical location, possible functional impairment  
499 associated with operation, and a risk of tissue necrosis after sclerotherapy, more effective therapies are,  
500 however, needed for the treatment of AST and VM. Previously, mTOR inhibitor sirolimus has been  
501 tested in clinical trials with promising results for patients having VM and somatic mutations leading to  
502 constitutive activation of the PI3K pathway (19,20) (ClinicalTrials.gov, study nro: NCT02638389).

503 In sporadic VM, PI3K/Akt activating somatic TEK mutations are associated with skin lesions and  
504 p.L914F mutation is found in 60% of the patients (9,10). Genetics and disease mechanisms in non-skin  
505 associated VMs are less defined. VMs with somatic mutations in PIK3CA do not extend to skin (9) and  
506 are found in approximately 20% of the patients. In the study of Castel et al. (2016), 24% of the patients  
507 (4/17) having intramuscular sporadic VM lesions had mutation in PIK3CA gene and 2 out of 17 patients  
508 in TEK p.L914F (38). Prior to our study, in AST, only 7 patients have been confirmed to have oncogenic  
509 PIK3CA variants, of these 3 patients had PIK3CA p.H1047R variant, 3 PIK3CA p.E542K variant, and  
510 1 PIK3CA p.E545K variant (11). Our study is the first to demonstrate PIK3CA mutations also in ECs  
511 isolated from AST. Oncogenic PIK3CA variants were detected in our study in the majority of AST  
512 lesions (75%, 15/20 patients), supporting thus the finding of Boccara et al. (11) and the importance of  
513 oncogenic PIK3CA mutation in AST lesion formation. Additionally, we detected in this study a novel  
514 somatic mutation in PIK3CA, p.H1047L, in AST.



515 Besides genotypically abnormal ECs, other cell types of venous lesions could affect angiogenic  
516 phenotype of ECs e.g. via secretion of paracrine growth factors and thus, contributing to lesion  
517 formation. We demonstrate here for the first time that TGFA, a known pro-angiogenic growth factor  
518 (26,28,29) , is upregulated in VM and AST lesions, and in the presence of an oncogenic PIK3CA  
519 variant. TGFA and its receptor EGFR located in both intervascular stromal cells and the endothelium.  
520 We further demonstrated that patient SCs were able to: i) secrete TGFA and VEGF-A; and ii) transform  
521 genotypically normal ECs toward a pro-angiogenic phenotype. Accordingly, our experiments in a  
522 modified mouse xenograft model showed an increase in lesion vascularization when genotypically  
523 normal fibroblasts were used together with human ECs expressing PIK3CA isoforms. We also  
524 demonstrated that afatinib, an irreversible inhibitor of EGFR/ErbB1, ErbB2 and ErbB4, was able to  
525 decrease PIK3CA<sup>H1047R</sup>-induced lesion growth and vascularization. As ErbB signaling has been shown  
526 to induce activation of RAS/MAPK and PI3K/Akt pathways that are involved in cell proliferation and  
527 inhibition of apoptosis (30), targeting of both ECs and intervascular SCs by pharmacological agents  
528 could be beneficial to increase treatment response in patients with VM or AST having a fibrous  
529 component.

530 Previously, hypoxic avascular stromal cells were suggested to regulate angiogenesis. For example,  
531 cancer-associated fibroblasts can induce tumor initiation, progression and angiogenesis by producing  
532 growth factors, proteases, chemokines, and extracellular matrix (39,40). Fibroblasts have also been  
533 shown to modulate EC/pericyte migration, and to be crucial for lumen formation. They are also the  
534 main source of VEGF-A production in cancer (41). Perturbation of VEGFR signaling is linked to most  
535 vascular anomalies and has been demonstrated for example in infantile hemangioma and arteriovenous  
536 malformation (42,43). To our knowledge, no study has reported the role of VEGF-A or TGFA in VM  
537 or AST. A comparison of various vascular anomalies is needed to understand the possible diagnostic  
538 significance of TGFA/EGFR expression in VM and AST.

539 Current treatment strategies targeting cancer associated fibroblasts aim to: i) inhibit secretion of  
540 pro-angiogenic growth factors; ii) reduce accumulation of cells to tumour microenvironment via anti-

541 fibrotic agents; and iii) inhibit expression of lysyl oxidase-like proteins that regulate ECM integrity  
542 (44). Whereas cancer cells are considered genetically instable by accruing mutations that allow escape  
543 from cellular regulatory mechanisms and enable development of drug resistance, cancer-associated  
544 stromal cells are not typically mutated in cancer. In VM, mutations in PIK3CA or TEK genes have been  
545 shown to occur solely in EC fraction (36). We also detected PIK3CA mutations only in EC fraction of  
546 AST lesions. Besides the clear role of these mutations in ECs driving the lesion formation, we here  
547 demonstrate lesion-derived intervascular SCs to be able to secrete pro-angiogenic growth factors that  
548 can change genotypically normal EC function and enable angiogenesis. Besides genetic factors, hypoxic  
549 environment has been shown to induce overexpression of EGFR in cancer (45) and to upregulate both  
550 TGFA and VEGF-A in cancer and ECs (31,32). In addition, depletion of both HIF1A and HIF2A have  
551 previously been shown to lead to downregulation TGFA expression (34).

552 In our study, HIFs and their transcriptional target, VEGF-A, were found to have a strong or  
553 moderate positive correlation with TGFA mRNA in patient lesions. TGFA expression was also shown  
554 to be upregulated in the presence of oncogenic PIK3CA variant, and common transcriptional targets for  
555 patient ECs and HIFs or PIK3CA expressing ECs were detected. As some of the patients used in this  
556 study had received sclerotherapy, the treatment may have caused hypoxic environment of cells. To  
557 conclude, we have identified, for the first time, involvement of TGFA in vascular lesions and  
558 demonstrated the role of fibroblasts in mediating lesion growth and angiogenesis. Targeting of  
559 intervascular SCs together with ECs could be beneficial for the treatment of VM and AST with fibrous  
560 connective tissue and needs further assessment.

561 **ACKNOWLEDGEMENT**

562 This study was supported by grants from the Academy of Finland (328835 and 321535 JPL; 287478  
563 and 294073 MUK), Ella and Georg Ehnrooth foundation (JPL), CoE of Cardiovascular and Metabolic  
564 Disease (307402, SYH), the ERC grants (GA670951 SYH and 802825 MUK), Sigrid Jusélius  
565 Foundation (MUK, SYH), Finnish Foundation for Cardiovascular Research (MUK, SYH, JPL), Jane  
566 and Aatos Erkko Foundation (MUK) and Department of Musculoskeletal and Plastic Surgery, Helsinki  
567 University Hospital (PV). Authors thank Gordon Mills & Kenneth Scott for providing pHAGE-  
568 PIK3CA and pHAGE-PIK3CA-H1047R plasmids; National Virus Vector Laboratory (University of  
569 Eastern Finland, A.I. Virtanen Institute, Kuopio, Finland) for producing the lentiviral vectors; Single  
570 Cell Genomics Core (University of Eastern Finland, A.I. Virtanen Institute, Kuopio, Finland) for  
571 preparing and sequencing RNAseq libraries, UEF Cell and Tissue Imaging Unit (University of Eastern  
572 Finland, Biocenter Kuopio and Biocenter Finland, Kuopio, Finland) for the support on Confocal  
573 imaging and experiments with Incucyte; and the personnel at the Kuopio University Hospital maternity  
574 ward (Kuopio, Finland) for providing umbilical cords for HUVEC extraction

575

576 **COMPETING INTERESTS**

577 The authors have declared that no conflict of interest exists.

578

579 **AVAILABILITY OF DATA AND MATERIAL**

580 RNA-seq data has been submitted to NCBI Gene Expression Omnibus under accession number  
581 GSE130807 and GSE196311.

582

583

584 **AUTHORS' CONTRIBUTIONS**

585 HI, SJ and JPL performed research and wrote the manuscript. PV applied for a research permission  
586 from Helsinki University Hospital, contacted and informed the patients. PV and ET performed clinical  
587 diagnosis, surgery and collected tissue samples for the study. JL did pathological analysis. SJ, HI, SK,  
588 MK, JIL and HR performed bead assays or histology. MUK and TÖ did RNA-sequencing and analysis.  
589 EA provided control samples. HP and SL did animal experiments. NLK was involved in lentivirus  
590 vector work. Vascular Anomaly Team of Helsinki University Hospital (PS, PV, JL, KL, JA) assessed  
591 the patients and edited the manuscript. JA provided MRI data. SYH provided materials and reagents for  
592 the study. JPL designed and provided materials and reagents for the study.

593

594 **SUPPLEMENTARY FILES**

595 **Supplementary Material 1.** NGS experiments

596 **Supplementary Material 2.** gBlock gene fragments

597 **Source file for Figure 2 – figure supplement 1.** Raw data for western blot images

598 **Source file for Figure 6.** Raw data for western blot images

599

## 600 MATERIALS AND METHODS

601 **Patient cohort.** The multidisciplinary vascular anomaly team of Helsinki University Hospital (HUS)  
602 evaluated the patients clinically and radiologically and selected the treatment line. Patient samples were  
603 collected in elective surgery in the Department of Plastic Surgery, Helsinki, HUS, Helsinki, Finland. A  
604 decision for surgical treatment was based on clinical practices. Patient sample collection was approved  
605 by the Ethical Committee of the HUS (Decision No 127/13/03/02/2010 and No 1394/2020). Informed  
606 consent was obtained from all patients included in the study. Samples were studied by a pathologist  
607 (JL) specialized in vascular anomalies and classified according to ISSVA guidelines by using  
608 hematoxylin-eosin staining and immunohistochemistry (Glut-1, CD31, CD34 and D2-40). For DNA,  
609 RNA and protein work, tissue samples were taken immediately after resection from the middle of the  
610 lesion, snap-frozen in liquid nitrogen and stored at -70°C. Optionally, tissue samples were fixed with 4  
611 % paraformaldehyde for immunohistochemical stainings or collected to Dulbecco's Modified Eagles'  
612 Medium (DMEM; Sigma-Aldrich, St. Louis, MOK, USA) supplemented with 20 % Fetal Bovine Serum  
613 (FBS), 20 mM HEPES and antibiotics for cell isolation. Control tissue samples were normal vascular  
614 specimens (from mammary artery, n=4; or saphenous vein n=2) from atherosclerotic patients  
615 undergoing bypass surgery. After removal, tissue material not needed for a bypass graft was snap-frozen  
616 in liquid nitrogen and used for research purposes by approval from the Research Ethics Committee of  
617 the Northern Savo Hospital District (Decision No 139/2015).

618 **Cell culture.** Resected patient tissue samples were treated with collagenase type II (Worthington,  
619 Lakewood, NJ, USA) for an hour at 37°C under agitation. Selection of ECs was performed with CD31  
620 MicroBead Kit and a magnetic column (Miltenyi Biotec, Bergisch Gladbach, Germany) as previously  
621 described (46). Patient-derived ECs were cultured on fibronectin/gelatin coated cell culture flasks in  
622 Endothelial Cell Growth medium (EGM; Cambrex Biosciences, East Rutherford, NJ, USA)  
623 supplemented with 20 % FBS. Patient-derived intervascular SCs from flow-through fraction were  
624 maintained in DMEM supplemented with 10 % FBS and antibiotics. HUVECs were isolated from  
625 human umbilical cords with approval from the Research Ethics Committee of the Northern Savo

626 Hospital District, Kuopio, Finland (Decision No 341/2015) as previously described (47) and maintained  
627 in EGM. Human saphenous vein endothelial cells (HsaVEC) and control human pulmonary fibroblasts  
628 (HPF-c) were obtained from PromoCell (3 donors/each, Heidelberg, Germany) and maintained  
629 according to manufacturer's instructions in EGM supplemented with 20 % FBS or in DMEM  
630 supplemented with 10 % FBS and antibiotics, respectively. Selection of control ECs was performed by  
631 CD31 MicroBead Kit. Patient SCs were characterized prior to experiments by western blot showing to  
632 be negative for EC marker CD31, and positive for fibroblast and smooth muscle cell marker vimentin.  
633 Additionally, alpha-smooth muscle cell actin, a marker of both myofibroblasts and smooth muscle cells,  
634 was detected in 2 cell lines (**Fig. 2 – figure supplement 1D-F**).

635 **Lentivirus vectors.** pHAGE-PIK3CA encoding PIK3CA wild-type (wt; Addgene plasmid #116771;  
636 <http://n2t.net/addgene:116771>; RRID:Addgene\_116771) and pHAGE-PIK3CA-H1047R encoding  
637 PIK3CA with oncogenic point mutation on p.H1047R (Addgene plasmid #116500;  
638 <http://n2t.net/addgene:116500>; RRID:Addgene\_116500) were received as gifts from Gordon Mills &  
639 Kenneth Scott (48). Third generation lentiviruses were produced in National Virus Vector Laboratories  
640 (NVVL, UEF, Kuopio, Finland). For experiments, HUVECs were seeded onto 6-well plates at a density  
641 of 125.000 cells/well and allowed to adhere for 4 hours. Cells were transduced in fresh media with  
642 lentivirus vectors expressing PIK3CA WT or PIK3CA p.H1047R with multiplicity of infection (MOI)  
643 of 7.5-10. After culturing the cells for 16 h, cells were washed with PBS (Thermo Fisher Scientific,  
644 Waltham, MA, USA) and fresh growth medium was added. After 72 h cells were passaged onto new  
645 6-well plates and culturing continued for an additional 72 h after which cells were harvested in Buffer  
646 RLT (Qiagen; for RNA-sequencing, RT-qPCR) or used for cell culture experiments.

647 **RNA-sequencing and gene ontology analysis.** Total RNA of ECs was isolated using RNeasy Mini Kit  
648 according to manufacturer's instructions (Qiagen, Hilden, Germany).

649 For patient-derived cell cultures, preparation of RNA-Seq libraries as well as data analysis for  
650 differentially expressed genes was performed as previously described (49). Briefly, Poly(A)-RNA was  
651 enriched with MicroPoly(A) Purist Kit, fragmented using RNA Fragmentation Reagents (Thermo

652 Fisher Scientific) and purified by running through P-30 column (Bio-Rad Laboratories, Hercules, CA,  
653 USA). The 3' end of the fragmented RNA was dephosphorylated with T4 polynucleotide kinase (PNK,  
654 New England Biolabs, Ipswich, MA, USA) followed by heat-inactivation. Dephosphorylation reactions  
655 were purified using anti-BrdU beads (SantaCruz Biotech, Heidelberg, Germany) and precipitated  
656 overnight. Poly(A)-tailing and cDNA synthesis was performed the next day. After cDNA synthesis,  
657 Exonuclease I (New England Biolabs) was used to catalyze the removal of excess oligos. The DNA-  
658 RNA hybrid was purified using ChIP DNA Clean & Concentrator Kit (Zymo Research Corporation,  
659 Irvine, CA, USA), RNaseH treated and circularized. The libraries were amplified for 11-14 cycles with  
660 the oNTI201-primer and a barcode specific primer oNTI200-index. The final product was run on Novex  
661 10% TBE gel, purified and cleaned up as above. The libraries were sequenced on the Illumina Genome  
662 Analyzer 2 or HiSeq 2000 according to the manufacturer's instructions (GeneCore, EMBL, Heidelberg,  
663 Germany). RNA-seq was mapped using TopHat (v2.0.7). Poor quality reads were filtered out (minimum  
664 97% of bp over quality cutoff 10) and tag per base value was set to 3. Differentially expressed genes  
665 were identified using edgeR (50).

666 For lentivirus experiments, RNA-Seq libraries were prepared from total RNA using the QuantSeq  
667 3' mRNA-Seq Library Prep Kit FWD for Illumina (Lexogen, Vienna, Austria) according to the  
668 manufacturer's instructions. The libraries were sequenced with a read length of 68 bp (single end) on  
669 an Illumina NextSeq 500 sequencer. The RNA-Seq reads were processed using the nf-core RNA-Seq  
670 pipeline (version 3.0) (51) with the GRCh37 genome and the default quantification workflow (STAR  
671 aligner for read mapping and Salmon for gene quantification), followed by DESeq2 (version 1.22.2)  
672 (52) differential expression analysis.

673 Each sequencing experiment was normalized to a total of  $10^7$  uniquely mapped tags and visualized  
674 by preparing custom tracks for the UCSC Genome browser. Clustering results were generated by  
675 Cluster 3.0 (53) by normalizing and centering the gene expression tags to range from -1 to 1. The  
676 following thresholds were used: FDR < 0.1 (Patient<sup>CD31+</sup>EC vs HUVEC), p-value < 0.05 (Patient  
677 <sup>CD31+</sup>EC vs HsaVEC), FDR-adjusted p-value < 0.1 (PIK3CA<sup>H1047R</sup> vs PIK3CA<sup>wt</sup> -transduced ECs and  
678 PIK3CAmut+ Patient<sup>CD31+</sup>EC vs Ctrl ECs), RPKM > 0.5 and log<sub>2</sub> fold changes > 1.0 and < -1.0. For  
679 gene ontology analysis, HOMER 4.3. or the EnrichR web server was used (54-57). Gene Set Enrichment

680 Analysis (GSEA; <https://www.biorxiv.org/content/10.1101/060012v3>) with a custom gene set calling  
681 was used to compare similarity of gene expression pattern between separate experiments. Motif  
682 enrichment was analyzed from the merged list of H3K4me2- and H3K27ac-defined enhancers that were  
683 located within 100 kb of the transcriptional start site (TSSs) of the differentially expressed genes. The  
684 ‘findMotifsGenome.pl’ command in the HOMER software was used with default settings, peak size of  
685 200 bp and motif length of 8, 10 and 12 bases. A random set of genomic positions matched for GC%  
686 content was used as background. Enhancer elements enriched for H3K4me2 and H3K27ac marks in  
687 HUVECs (data from GSE29611) were generated using the ‘findPeaks’ command in the HOMER  
688 software (55) with default settings for ‘style histone’ option: identification of 500 bp regions, 4-fold  
689 enrichment over input tag count 4, 0-fold enrichment over local tag count and 0.001 FDR significance.  
690 To select the coordinates of enhancers within 100 kb of the TSS ‘mergePeaks’ command with -cobound  
691 1 and -d 100000 were used.

692 RNA-seq data has been submitted to NCBI Gene Expression Omnibus under accession numbers  
693 GSE130807 and GSE196311 (GEO reviewer access tokens; wbivkayaxhojdqp and mbehiikgvtmfryh,  
694 respectively). A summary of the NGS samples and gene lists are found in **Table 3** and **Supplementary**  
695 **Material 1**.

696 **qRT-PCR.** Total RNA was isolated from control/patient cells and tissue samples either with RNeasy  
697 Mini Kit (Qiagen, Hilden, Germany) or Tri Reagent according to manufacturer’s instructions (Sigma-  
698 Aldrich). cDNA synthesis and qRT-PCR were performed using target gene specific Taqman assays  
699 (ThermoFisher Scientific, **Table 4**). Amplification of beta-2 microglobulin (B2M; for tissue samples)  
700 or glyceraldehyde-3-phosphate dehydrogenase (GAPDH; for ECs, HPF-c and patient SCs) was used as  
701 an endogenous control to standardize the amount of RNA in each sample. Detection was performed  
702 with StepOnePlus Real-Time PCR System (Applied Biosystems, Foster City, CA, USA).

703



704 **Table 4. Taqman assays used in qRT-PCR analysis.**

| Gene   | Description                                                                | Assay ID      |
|--------|----------------------------------------------------------------------------|---------------|
| GAPDH  | Glyceraldehyde-3-phosphate dehydrogenase                                   | 4352934E      |
| B2M    | Beta-2-microglobulin                                                       | Hs00187842_m1 |
| TGFA   | Transforming growth factor A [assay 1]                                     | Hs00608187_m1 |
| TGFA   | Transforming growth factor A [assay 2]                                     | Hs00177401_m1 |
| TGFA   | Transforming growth factor A [assay 3]                                     | HsaCEP0053322 |
| ERBB1  | Protein tyrosine kinase ERBB1,<br>epidermal growth factor receptor         | Hs01076090_m1 |
| AREG   | Amphiregulin                                                               | Hs00950669_m1 |
| NRG1   | Neuregulin 1                                                               | Hs00247620_m1 |
| EPGN   | Epithelial mitogen, epigen                                                 | Hs02385424_m1 |
| VEGF-A | Vascular endothelial growth factor A                                       | Hs00900055_m1 |
| PIK3CA | Phosphatidylinositol-4,5-Bisphosphate 3-Kinase Catalytic Subunit- $\alpha$ | HsaCEP0050716 |

705

706 **Recombinant proteins and inhibitors.** Cells were seeded on 6-well plates at the density of 200.000  
707 cells/well. When cells reached 80 % confluency they were washed with PBS and synchronized with  
708 basal media containing 0.5 % FBS. After 16 h 50 ng/ml of recombinant human (rh)TGFA (Sigma-  
709 Aldrich) and/or Afatinib (5  $\mu$ M, MedChem Express, Monmouth Junction, NJ) was added to the wells.  
710 Corresponding concentration of DMSO was used as a control for Afatinib.

711 **ELISA.** Expression levels of TGFA and VEGF-A in cell culture supernatants were measured using  
712 Human Quantikine ELISAs (R&D Systems, Minneapolis, MN, USA) according to manufacturer's  
713 instructions. Due to limited availability of patient-derived cells, mRNA expression and protein secretion  
714 analysis with patient samples were done on the same wells. Thus, protein concentration measured from  
715 cell culture medium was normalized to total RNA extracted from the same well at the same time point.

716 **Fibrin bead assay.** Fibrin bead assay for HUVECs and HPF-c cells has been previously described  
717 (35,58). Here, cytodex microcarrier beads were coated with HUVECs and embedded into a fibrin gel.  
718 HPF-c cells or, for the first time in this study, patient-derived intervascular stromal<sup>CD31-, vimentin+</sup> cells  
719 were layered on top of the gel with or without rhTGFA, rhVEGF-A (R&D Systems) or their  
720 combination (50 ng/ml each). Culturing was continued by changing a fresh EGM  $\pm$  growth factors every  
721 other day. Afatinib (5  $\mu$ M) or DMSO was added to the wells on day 3 and day 5. On day 7, HPF-c layer  
722 on top of the fibrin gel was removed by trypsinization. ECs inside of the gel were fixed, permeabilized  
723 and stained with phalloidin-A635 (F-actin, Thermo Fisher Scientific) and DAPI. Imaging was

724 performed using LSM800 (Zeiss). 405/555nm diode lasers were used together with the appropriate  
725 emission filters (10x/0.3 PlanApo objective, 512x512 frame size). Image processing and quantitative  
726 analysis was performed from 3D-images by ImageJ (59), in a blinded manner by two independent  
727 observers. Sprouts containing >1 nuclei were included in the analysis. Segmented vascular area was  
728 additionally detected.

729 **siRNA transfection, followed by imaging of cell growth with IncuCyte.** HUVECs expressing  
730 PIK3CA p.H1047R or PIK3CA wt were transfected with a Silencer Select siRNA targeting to TGFA  
731 (ID: s14053) or negative control siRNAs (#1 and #2 mixed in ratio 1:1; all siRNA oligonucleotides  
732 from Thermo Fisher Scientific) as previously described (58). 48h post-transfection, HUVECs were  
733 trypsinized, suspended in endothelial basal medium supplemented with 1% FBS, mixed with genetically  
734 normal HPF-c (HUVEC-to-HPF-c ratio 8:1) and seeded on 24-well plates at a total density of 15 000  
735 cells/cm<sup>2</sup> (i.e. 25 000 HUVECs and 3750 HPF-c/well). Cellular growth in the presence of no additional  
736 growth factors was monitored using the IncuCyte S3 Live-cell Imaging System (Essen BioSciences  
737 Ltd., Hertfordshire, UK). Images were acquired in 3-h intervals, 4 images/well, for a 48-h period using  
738 a 10x objective. Mean confluency of the cells at each time point was analyzed, followed by quantitating  
739 relative growth rate in each condition based on a slope of the growth curve (**Fig. 4 – figure supplement**  
740 **2**).

741 **Immunohistology and whole immunomount stainings.** Avidin-biotin-HRP system (Vector  
742 Laboratories, Burlingame, CA, USA) with 3'-5'-diaminobenzidine (DAP; Zymed, S. San Francisco,  
743 CA, USA) color substrate was used for immunohistochemistry on 4-5 µm thick 4 % PFA-fixed paraffin-  
744 embedded sections. Hematoxylin (Vector Laboratories) was used as a background color. Frozen tissue  
745 sections (20-30 µm thick) were fixed for double immunofluorescence staining and blocked with a  
746 mixture of 1 % BSA and 10 % normal goat serum or with 3 % normal goat serum. Sections were  
747 incubated with primary antibodies and Alexa Fluor 488 or Alexa Fluor 594-conjugated secondary  
748 antibodies (A11020, A11037; Thermo Fisher Scientific, dilution 1:200). Mounting was performed with  
749 Vectashield medium with DAPI (Vector Laboratories). Sections without primary antibodies were used

750 as negative controls. Primary antibodies for all stainings were as follows: rabbit anti-TGFA  
751 (HPA042297, Sigma-Aldrich, dilution 1:50 and 1:100), rabbit polyclonal anti-pEGFR clone Tyr845  
752 (07-820, Merck, Kenilworth, NJ, USA, dilution 1:50), rabbit polyclonal anti-EGFR ab (HPA018530,  
753 Sigma-Aldrich, dilution 1:100), mouse monoclonal CD31 anti-human clone JC70A (M0823, Agilent  
754 Dako, Santa Clara, CA, USA, dilution 1:20 or 1:100) and rabbit polyclonal anti-CD31 ab (NB100-2284,  
755 Novus Biologicals, Centennial, CO, USA, dilution 1:50). Imaging was performed by Nikon Eclipse Ni-  
756 U microscope (10×/0.3 Plan Fluor or 20×/0.5 Plan Fluor objectives; Nikon, Tokyo, Japan) or by Zeiss  
757 LSM800 confocal laser scanning microscope using 405/488/561nm diode lasers together with the  
758 appropriate emission filters (20×/0.8 Plan Apochromat, 512x512 or 1024x1024 frame size). Maximum  
759 intensity projections were generated using the ImageJ program.

760 **SDS-PAGE electrophoresis and western blot.** Cells treated indicated times with rhTGFA (50 ng/ml)  
761 were washed with ice-cold PBS, followed by treatment with lysis buffer [50 mM Tris, pH 7.5, 150 mM  
762 NaCl, 1 mM EDTA, 1% Triton X-100, 0.5% sodium deoxycholate, 0.1% SDS, 10% glycerol, 1 mM  
763 sodium orthovanadate (Sigma-Aldrich), with protease inhibitors (Roche, Basel, Switzerland)]. Equal  
764 amounts of total protein (20 µg) from each sample were loaded on the gel and used for analysis on SDS-  
765 PAGE electrophoresis and western blot. Primary antibodies used for the immunodetection were  
766 phospho-EGFR ab (2234, CST, MA; dilution 1:1000), total EGFR ab (2646, CST, dilution 1:1000),  
767 aSMA (M0851, Dako, dilution 1:250), CD31 (M0823, Dako, dilution 1:500) and Vimentin (M0725,  
768 Dako, dilution 1:1000). Horse radish peroxidase (HRP)-conjugated secondary antibodies were  
769 purchased from Pierce. Antigen-antibody complexes were detected with PIERCE™ ECL Western  
770 Blotting Substrate (Thermo Fisher Scientific) and Gel Dox XR+ Gel Documentation System (Bio-Rad  
771 Laboratories).

772 **Mutational analysis.** DNA isolation and ddPCR were performed as previously described (60). Briefly,  
773 total DNA was isolated from patient-derived ECs with Tri Reagent according to manufacturer's  
774 instructions (Sigma-Aldrich). DNA isolations from tissue samples were done by lysing 50-100 mg  
775 sections of frozen tissue in Hard tissue homogenizing CK28 tubes containing 2.8 mm ceramic beads

776 (Bertin Technologies, Montigny-le-Bretonneux, France) with Precellys homogenizer (Bertin  
777 Instruments). Lysed tissues were treated with Proteinase K (Thermo Fisher Scientific) o/n at 50°C,  
778 followed by a DNA extraction with phenol:chloroform:isoamyl alcohol 25:24:1 (Amresco-inc, Solon,  
779 OH). Detection of PIK3CA c.3140A>G (p.H1047R), PIK3CA c.3140A>T (p.H1047L) PIK3CA  
780 c.1633G>A (p.E545K) and PIK3CA c.1624G>A (p.E542K) point mutations were performed on the  
781 QX200 ddPCR system (Bio-Rad Laboratories) by using PrimePCR ddPCR Mutation assays according  
782 to manufacturer's instructions (Bio-Rad Laboratories). Detection of TEK c.2740C>T (p.L914F)  
783 mutation was performed by using custom-design Taqman SNP Genotyping assays [Thermo Fisher  
784 Scientific; fwd 5'-CTTCCTCCAGGCTACTT-3', rev 5'-AATGCTGGGTCCGTCT-3', reporter 1  
785 (HEX) 5'-CTTGCGAAGGAAGTCCAGAAGGTTTC-3', and reporter 2 (FAM) 5'-  
786 CTTGCGAAAGAAGTCCAGAAGGTTTC-3']. Synthetic construct gBlocks Gene Fragments (IDT,  
787 Coralville, Iowa, USA; **Supplementary Material 2**) with and without a mutation were designed for  
788 each assay and used as positive control DNAs in ddPCR. DNA samples with mutation positive event >  
789 10 and fractional abundance > 0.5 % were considered as mutation positive.

790 **A modified xenograft model for vascular lesion.** Animal experiments were approved by National  
791 Experimental Animal Board of Finland (Decision No Esavi-2019-004672) and carried out in  
792 accordance with guidelines of the Finnish Act on Animal Experimentation.  $2.5 \times 10^6$  HUVECs  
793 expressing PIK3CA wt or PIK3CA p.H1047R were suspended in growth factor-reduced and phenol  
794 red-free Matrigel (Corning, New York, USA) with or without  $0.8 \times 10^6$  HPF-c cells and injected s.c.  
795 into both flanks of 6-weeks old female Athymic Nude-Foxn1<sup>nu</sup> mice (n=18; Envigo, Indiana, USA).  
796 For comparison lesion growth with or without oncogenic PIK3CA variant, each mouse had one plug  
797 with PIK3CA<sup>H1047R</sup> ECs and one with PIK3CA<sup>wt</sup> ECs. Prior injections, mice were randomised to  
798 groups receiving either ECs or ECs+HPF-cs, or to be treated with or without afatinib. Lesion size was  
799 measured twice a week from d4 onwards with a digital caliper. After lesions reached  $\sim 200 \mu\text{m}^3$  in size,  
800 25 mg/kg afatinib was given to mice once daily p.o. for 9 days (diluted in 10% DMSO, 40% PEG300,  
801 5% Tween-80 and 45% saline, MedChemExpress LLC, NJ). Lesions were dissected at d18-20, and  
802 lesion size was measured from the dissected explants (NIS-Elements AR). Volume was calculated

803 with the formula volume = (length x width<sup>2</sup>)/2, where the length is the longest diameter and width is  
804 the shortest diameter of the lesion. Explants were fixed with 4% paraformaldehyde for 4 hrs and  
805 embedded in paraffin. Vascularization, amount of erythrocytes and overall inflammation were  
806 evaluated from hematoxylin and eosin or CD31 staining by visual inspection in a blinded manner by  
807 one observer (H&E) or 2 independent observers (CD31) and scored on a scale of 0-3, 0 being the  
808 lowest score and 3 the highest (0 no vascularization, no erythrocytes, no inflammation/ 1 a few  
809 vascular channels, a few vascular channels filled with erythrocytes, mild inflammation/ 2 many  
810 vascular channels, many vascular channels filled with erythrocytes, moderate inflammation/ 3 a lot of  
811 vascular channels, most of the channels filled with erythrocytes, severe inflammation). EGFR  
812 expression was scored (0 no staining, 1 low amount, 2 moderate amount, 3 high amount). Exclusion  
813 criteria from the analysis were: i) unsuccessful plug formation; and ii) different anatomical location of  
814 the plug.

815 **Statistical analysis.** Results are expressed as means ± SEM. Statistical significance was analyzed using  
816 Kruskal-Wallis test with two-stage step-up method of Benjamini, Krieger and Yekutieli to control FDR  
817 [Fig. 1E: TGFA(1), TGFA(2), AREG; Fig. 2F: TGFA in ECs; Fig. 4E; Fig. 2 – figure supplement  
818 1C: EGFR in ECs; Fig. 3 – figure supplement 1C-D; data not normally distributed]; Brown-Forsythe  
819 and Welch ANOVA with Dunnett T3 post-hoc test (Fig. 1E: NRG1, EPGN; Fig. 4D; Fig. 6B; data  
820 normally distributed but unequal variances); One-way ANOVA with Tukey, Bonferroni or Sidac post-  
821 hoc test (Fig. 4F; Fig 6D; data normally distributed with equal variances); Two-tailed Mann-Whitney  
822 U test [Fig. 2A; Fig. 2F: TGFA in patient SCs; Fig. 4B; Fig. 5G-I (to compare scoring between each 2  
823 groups); Fig 7D-E, 7G; Fig. 2 – figure supplement 1A; Fig. 3 – figure supplement 3A; Fig. 4 – figure  
824 supplement 1A-B; Fig. 5 – figure supplement 1B-C (to compare scoring between each 2 groups);  
825 data not normally distributed]; two-tailed unpaired t-test with Welch's correction (Fig. 2G; Fig. 7C;  
826 Fig. 2 – figure supplement 1C: EGFR in patient SCs; Fig. 3 – figure supplement 3B; data normally  
827 distributed but unequal variances).  $p < 0.05$  was used to define a significant difference between the  
828 groups. Correlation between two markers was analyzed using Spearman rho (Fig. 3C-E; data not

829 normally distributed), with values  $> 0.6$  showing strong correlation and values 0.4-0.59 moderate  
830 correlation.

831



832 **REFERENCES**

- 833 1. Merrow AC, Gupta A, Patel MN, Adams DM. 2014 Revised Classification of Vascular Lesions  
834 from the International Society for the Study of Vascular Anomalies: Radiologic-Pathologic Update.  
835 *Radiographics*. 2016;36(5):1494-1516.
- 836 2. Mulliken JB, Burrows PE, Fishman SJ, eds. *Mulliken's and Young's Vascular anomalies*. Online  
837 edn ed. New York: Oxford Academic; 2013.
- 838 3. Hassanein AH, Mulliken JB, Fishman SJ, Alomari AI, Zurakowski D, Greene AK. Venous  
839 malformation: risk of progression during childhood and adolescence. *Ann Plast Surg*. 2012;68(2):198-  
840 201.
- 841 4. Domp Martin A, Vikkula M, Boon LM. Venous malformation: update on aetiopathogenesis,  
842 diagnosis and management. *Phlebology*. 2010;25(5):224-235.
- 843 5. Aronniemi J, Lohi J, Salminen P, et al. Angiomatosis of soft tissue as an important differential  
844 diagnosis for intramuscular venous malformations. *Phlebology*. 2017;32(7):474-481.
- 845 6. Brouillard P, Vikkula M. Vascular malformations: localized defects in vascular morphogenesis.  
846 *Clin Genet*. 2003;63(5):340-351.
- 847 7. Aronniemi J, Castren E, Lappalainen K, et al. Sclerotherapy complications of peripheral venous  
848 malformations. *Phlebology*. 2016;31(10):712-722.
- 849 8. Rao VK, Weiss SW. Angiomatosis of soft tissue. An analysis of the histologic features and clinical  
850 outcome in 51 cases. *Am J Surg Pathol*. 1992;16(8):764-771.
- 851 9. Limaye N, Kangas J, Mendola A, et al. Somatic Activating PIK3CA Mutations Cause Venous  
852 Malformation. *Am J Hum Genet*. 2015;97(6):914-921.

- 853 10. Soblet J, Limaye N, Uebelhoer M, Boon LM, Vikkula M. Variable Somatic TIE2 Mutations in  
854 Half of Sporadic Venous Malformations. *Mol Syndromol*. 2013;4(4):179-183.
- 855 11. Boccara O, Galmiche-Rolland L, Dadone-Montaudie B, et al. Soft tissue angiomatosis: another  
856 PIK3CA-related disorder. *Histopathology*. 2020;76(4):540-549.
- 857 12. Natynki M, Kangas J, Miinalainen I, et al. Common and specific effects of TIE2 mutations  
858 causing venous malformations. *Hum Mol Genet*. 2015;24(22):6374-6389.
- 859 13. Uebelhoer M, Natynki M, Kangas J, et al. Venous malformation-causative TIE2 mutations  
860 mediate an AKT-dependent decrease in PDGFB. *Hum Mol Genet*. 2013;22(17):3438-3448.
- 861 14. Rosenblatt M. Endovascular management of venous malformations. *Phlebology*. 2007;22(6):264-  
862 275.
- 863 15. Steiner F, FitzJohn T, Tan ST. Surgical treatment for venous malformation. *J Plast Reconstr*  
864 *Aesthet Surg*. 2013;66(12):1741-1749.
- 865 16. Hage AN, Chick JFB, Srinivasa RN, et al. Treatment of Venous Malformations: The Data, Where  
866 We Are, and How It Is Done. *Tech Vasc Interv Radiol*. 2018;21(2):45-54.
- 867 17. Cornelis FH, Labreze C, Pinsolle V, et al. Percutaneous Image-Guided Cryoablation as Second-  
868 Line Therapy of Soft-Tissue Venous Vascular Malformations of Extremities: A Prospective Study of  
869 Safety and 6-Month Efficacy. *Cardiovasc Intervent Radiol*. 2017;40(9):1358-1366.
- 870 18. Patel PA, Barnacle AM, Stuart S, Amaral JG, John PR. Endovenous laser ablation therapy in  
871 children: applications and outcomes. *Pediatr Radiol*. 2017;47(10):1353-1363.
- 872 19. Adams DM, Trenor CC, Hammill AM, et al. Efficacy and Safety of Sirolimus in the Treatment of  
873 Complicated Vascular Anomalies. *Pediatrics*. 2016;137(2):e20153257-3257.

- 874 20. Boscolo E, Limaye N, Huang L, et al. Rapamycin improves TIE2-mutated venous malformation  
875 in murine model and human subjects. *J Clin Invest*. 2015;125(9):3491-3504.
- 876 21. Bussard KM, Mutkus L, Stumpf K, Gomez-Manzano C, Marini FC. Tumor-associated stromal  
877 cells as key contributors to the tumor microenvironment. *Breast Cancer Res*. 2016;18(1):84-016.
- 878 22. Donnem T, Al-Saad S, Al-Shibli K, Andersen S, Busund L, Bremnes R. Prognostic impact of  
879 platelet-derived growth factors in non-small cell lung cancer tumor and stromal cells. *J Thorac Oncol*.  
880 2008;3(9):963-970.
- 881 23. Criscitiello C, Esposito A, Curigliano G. Tumor-stroma crosstalk: targeting stroma in breast  
882 cancer. *Curr Opin Oncol*. 2014;26(6):551-555.
- 883 24. Wee P, Wang Z. Epidermal Growth Factor Receptor Cell Proliferation Signaling Pathways.  
884 *Cancers (Basel)*. 2017;9(5):10.3390/cancers9050052.
- 885 25. Thomas SM, Bhola NE, Zhang Q, et al. Cross-talk between G protein-coupled receptor and  
886 epidermal growth factor receptor signaling pathways contributes to growth and invasion of head and  
887 neck squamous cell carcinoma. *Cancer Res*. 2006;66(24):11831-11839.
- 888 26. De Luca A, Carotenuto A, Rachiglio A, et al. The role of the EGFR signaling in tumor  
889 microenvironment. *J Cell Physiol*. 2008;214(3):559-567.
- 890 27. Ginsberg D. EGFR signaling inhibits E2F1-induced apoptosis in vivo: implications for cancer  
891 therapy. *Sci STKE*. 2007;2007(371):pe4.
- 892 28. Leker RR, Toth ZE, Shahar T, et al. Transforming growth factor alpha induces angiogenesis and  
893 neurogenesis following stroke. *Neuroscience*. 2009;163(1):233-243.
- 894 29. Schreiber AB, Winkler ME, Derynck R. Transforming growth factor-alpha: a more potent  
895 angiogenic mediator than epidermal growth factor. *Science*. 1986;232(4755):1250-1253.

- 896 30. Zong S, Li W, Li H, et al. Identification of hypoxia-regulated angiogenic genes in colorectal  
897 cancer. *Biochem Biophys Res Commun*. 2017;493(1):461-467.
- 898 31. Gunaratnam L, Morley M, Franovic A, et al. Hypoxia inducible factor activates the transforming  
899 growth factor-alpha/epidermal growth factor receptor growth stimulatory pathway in VHL(-/-) renal  
900 cell carcinoma cells. *J Biol Chem*. 2003;278(45):44966-44974.
- 901 32. Lee YC, Chang YC, Wu CC, Huang CC. Hypoxia-Preconditioned Human Umbilical Vein  
902 Endothelial Cells Protect Against Neurovascular Damage After Hypoxic Ischemia in Neonatal Brain.  
903 *Mol Neurobiol*. 2018;55(10):7743-7757.
- 904 33. Krishnamachary B, Berg-Dixon S, Kelly B, et al. Regulation of colon carcinoma cell invasion by  
905 hypoxia-inducible factor 1. *Cancer Res*. 2003;63(5):1138-1143.
- 906 34. Chang LH, Pan SL, Lai CY, Tsai AC, Teng CM. Activated PAR-2 regulates pancreatic cancer  
907 progression through ILK/HIF- $\alpha$ -induced TGF- $\alpha$  expression and MEK/VEGF-A-mediated  
908 angiogenesis. *Am J Pathol*. 2013;183(2):566-575.
- 909 35. Nakatsu MN, Davis J, Hughes CC. Optimized fibrin gel bead assay for the study of angiogenesis.  
910 *J Vis Exp*. 2007;(3):186. doi(3):186.
- 911 36. Goines J, Li X, Cai Y, et al. A xenograft model for venous malformation. *Angiogenesis*.  
912 2018;21(4):725-735.
- 913 37. Verajankorva E, Rautio R, Giordano S, Koskivuo I, Savolainen O. The Efficiency of  
914 Sclerotherapy in the Treatment of Vascular Malformations: A Retrospective Study of 63 Patients.  
915 *Plast Surg Int*. 2016;2016:2809152.
- 916 38. Castel P, Carmona FJ, Grego-Bessa J, et al. Somatic PIK3CA mutations as a driver of sporadic  
917 venous malformations. *Sci Transl Med*. 2016;8(332):332ra42.
- 918 39. Kalluri R. The biology and function of fibroblasts in cancer. *Nat Rev Cancer*. 2016;16(9):582-598.

- 919 40. Watnick RS. The role of the tumor microenvironment in regulating angiogenesis. *Cold Spring*  
920 *Harb Perspect Med.* 2012;2(12):a006676.
- 921 41. Hughes CC. Endothelial-stromal interactions in angiogenesis. *Curr Opin Hematol.*  
922 2008;15(3):204-209.
- 923 42. Chang J, Most D, Bresnick S, et al. Proliferative hemangiomas: analysis of cytokine gene  
924 expression and angiogenesis. *Plast Reconstr Surg.* 1999;103(1):1-9; discussion 10.
- 925 43. Koizumi T, Shiraishi T, Hagihara N, Tabuchi K, Hayashi T, Kawano T. Expression of vascular  
926 endothelial growth factors and their receptors in and around intracranial arteriovenous malformations.  
927 *Neurosurgery.* 2002;50:117-124.
- 928 44. Pure E, Lo A. Can Targeting Stroma Pave the Way to Enhanced Antitumor Immunity and  
929 Immunotherapy of Solid Tumors? *Cancer Immunol Res.* 2016;4(4):269-278.
- 930 45. Franovic A, Gunaratnam L, Smith K, Robert I, Patten D, Lee S. Translational up-regulation of the  
931 EGFR by tumor hypoxia provides a nonmutational explanation for its overexpression in human  
932 cancer. *Proc Natl Acad Sci U S A.* 2007;104(32):13092-13097.
- 933 46. Partanen TA, Vuola P, Jauhiainen S, et al. Neuropilin-2 and vascular endothelial growth factor  
934 receptor-3 are up-regulated in human vascular malformations. *Angiogenesis.* 2013;16(1):137-146.
- 935 47. Jaffe EA, Nachman RL, Becker CG, Minick CR. Culture of human endothelial cells derived from  
936 umbilical veins. Identification by morphologic and immunologic criteria. *J Clin Invest.*  
937 1973;52(11):2745-2756.
- 938 48. Ng PK, Li J, Jeong KJ, et al. Systematic Functional Annotation of Somatic Mutations in Cancer.  
939 *Cancer Cell.* 2018;33(3):450-462.e10.

- 940 49. Laakkonen JP, Lappalainen JP, Theelen TL, et al. Differential regulation of angiogenic cellular  
941 processes and claudin-5 by histamine and VEGF via PI3K-signaling, transcription factor SNAI2 and  
942 interleukin-8. *Angiogenesis*. 2017;20(1):109-124.
- 943 50. Robinson MD, McCarthy DJ, Smyth GK. edgeR: a Bioconductor package for differential  
944 expression analysis of digital gene expression data. *Bioinformatics*. 2010;26(1):139-140.
- 945 51. Ewels PA, Peltzer A, Fillinger S, et al. The nf-core framework for community-curated  
946 bioinformatics pipelines. *Nat Biotechnol*. 2020;38(3):276-278.
- 947 52. Love MI, Huber W, Anders S. Moderated estimation of fold change and dispersion for RNA-seq  
948 data with DESeq2. *Genome Biol*. 2014;15(12):550.
- 949 53. de Hoon MJ, Imoto S, Nolan J, Miyano S. Open source clustering software. *Bioinformatics*.  
950 2004;20(9):1453-1454.
- 951 54. Chen EY, Tan CM, Kou Y, et al. Enrichr: interactive and collaborative HTML5 gene list  
952 enrichment analysis tool. *BMC bioinformatics*. 2013;14:128.
- 953 55. Heinz S, Benner C, Spann N, et al. Simple combinations of lineage-determining transcription  
954 factors prime cis-regulatory elements required for macrophage and B cell identities. *Mol Cell*.  
955 2010;38(4):576-589.
- 956 56. Kuleshov MV, Jones MR, Rouillard AD, et al. Enrichr: a comprehensive gene set enrichment  
957 analysis web server 2016 update. *Nucleic Acids Res*. 2016;44(W1):W90-7.
- 958 57. Xie Z, Bailey A, Kuleshov MV, et al. Gene Set Knowledge Discovery with Enrichr. *Curr Protoc*.  
959 2021;1(3):e90.
- 960 58. Pulkkinen HH, Kiema M, Lappalainen JP, et al. BMP6/TAZ-Hippo signaling modulates  
961 angiogenesis and endothelial cell response to VEGF. *Angiogenesis*. 2021;24(1):129-144.



962 59. Abràmoff M, Magalhães P, Ram S. Image Processing with ImageJ. *Biophotonics International*.  
963 2004;11(7):36-42.

964 60. Nikolaev SI, Vetiska S, Bonilla X, et al. Somatic Activating KRAS Mutations in Arteriovenous  
965 Malformations of the Brain. *N Engl J Med*. 2018;378(3):250-261.

966

967
